# Supplementary material for: Multifunctional assistant acceptor modulated pyrenyl phenanthrimidazole derivatives for highly efficient blue and host-sensitized OLEDs
Source: Royal Society of Chemistry journal article supplement (doi:10.1039/d1tc04227k), 2021-01-01
Supplement: d1tc04227k1.pdf [file d1tc04227k1.pdf]

## Supporting information

**Multifunctional assistant acceptor modulated pyrenyl phenanthrimidazole derivatives for highly efficient blue and host-sensitized OLEDs**

**Jayaraman Jayabharathi\*, Jagathratchagan Anudeebhana, Venugopal Thanikachalam, Sekar Sivaraj**

Department of Chemistry, Material Science Lab, Annamalai University, Annamalai nagar, Tamilnadu- 608 002, India

### Contents

**SI-I: General Information & Scheme**

**SI-II: Charge-Transfer indexes & Figures**

**SI-III: Solvatochromism for HLCT character**

**SI-IV: Potential energy scan (PES)**

**SI-V: Tables**

## SI-I. (i) General information

All the reagents and solvents were purchased from commercial sources and used as received. The emitters were subjected to sublimation to enhance the purity before photoluminescence and electroluminescence investigations.  $^1\text{H}$  and  $^{13}\text{C}$  NMR spectra were recorded at room temperature on Bruker 400 spectrometer in  $\text{CD}_2\text{Cl}_2$ . The mass spectra were recorded on Agilent LCMS VL SD. The UV-Vis spectra were recorded on Lambda 35 PerkinElmer (solution)/ Lambda 35 spectrophotometer (RSA-PE-20) (film). The emission spectra were recorded with Perkin Elmer LS55 spectrometer and quantum yield was measured with fluorescence spectrometer (Model-F7100 with integrating sphere). The decomposition temperature ( $T_d$ ) and glass transition temperature ( $T_g$ ) were measured with NETZSCH (DSC-204) ( $10^\circ\text{C min}^{-1}$ ;  $\text{N}_2$  atmosphere), respectively. Fluorescence lifetime was estimated by time correlated single-photon counting (TCSPC) method on Horiba Fluorocube-01-NL lifetime system: nano LED is an excitation source with TBX-PS is detector; DAS6 software was employed to analyse the decay by reconvolution method. Oxidation potential were measured from potentiostat electrochemical analyzer (CHI 630A) in dichloromethane at a scan rate of  $100\text{ mV s}^{-1}$ , platinum wire as auxiliary electrode, glass carbon disk as working electrode and  $\text{Ag}/\text{Ag}^+$  as reference electrode. Ferrocene was used as an internal standard with HOMO of  $-4.80\text{ eV}$  and  $0.1\text{M}$  tetrabutylammoniumperchlorate in  $\text{CH}_2\text{Cl}_2$  as supporting electrolyte. All density functional theory (DFT) calculations were carried out using Gaussian 09 package [1] and Multiwfn [1]. The ground-state ( $\text{S}_0$ ) geometries in the gas phase were initially optimized at the level of B3LYP/6-31G (d, p), a commonly used level for the precise geometry optimization. Then, geometry optimization of  $\text{S}_1$  and excited-state properties based on  $\text{S}_1$  geometries were studied using time-dependent DFT (TD-DFT) at the same level. The natural transition orbitals (HONTOs and LUNTOs) with hole-particle contribution, transition density matrix and overlap integral have been studied in detail.

## (ii) OLEDs fabrication and measurement

ITO glass (resistance 20  $\Omega$ /sq) were cleaned with acetone, deionized water and isopropanol and dried (120 °C) followed by UV-zone treatment (20 min) and transferred into deposition system. The devices were fabricated by multiple source beam deposition method (vacuum pressure -  $4 \times 10^{-5}$  mbar). Evaporation rate of 2-4  $\text{\AA} \text{ s}^{-1}$  (organic materials) and 0.1 and 4  $\text{\AA} \text{ s}^{-1}$  for LiF and metal electrodes were applied, respectively. The thickness of each decomposition layer was monitored with quartz crystal thickness monitor. The EL measurement was recorded with USB-650-VIS-NIR spectrometer (Ocean Optics, Inc, USA). The current density-voltage-luminance (J-V-L) characteristics were performed using source meter (Keithley 2450) equipped with LS-110 light intensity meter. The external quantum efficiency was determined from luminance, current density and EL spectrum assuming Lambertian distribution.

## (iii) Synthesis of emissive materials

Synthetic route of the emissive materials was outlined in Scheme S1.

### (a) 4-(6,9-dibromo-2-(pyren-1-yl)-1H-phenanthro[9,10-d]imidazol-1-yl)naphthalene-1-carbonitrile (BrPPINCN)

The intermediate, BrPPINCN was synthesized by refluxing 3, 6-dibromophenanthrene-9, 10-dione (8.2 mmol), pyrene-1-carbaldehyde (12.3 mmol), 4-formyl-1-naphthonitrile (50 mmol) and ammonium acetate (101.8 mmol) in glacial acetic acid (40 ml) for 12 h (120°C;  $\text{N}_2$ ). The yellow solution was poured into ethanol and the separated solid was washed with methanol and dried. The crude was purified by column chromatography. Yield: 76 %.  $^1\text{H}$  NMR (400 MHz,  $\text{CDCl}_3$ ),  $\delta$  (ppm): 7.36-7.58 (m, 4H), 7.64-7.96 (m, 7H), 8.00-8.14 (m, 4H), 8.48-8.73 (t, 4H), 8.94 (d, 2H).  $^{13}\text{C}$  NMR (400 MHz,  $\text{CDCl}_3$ ),  $\delta$  (ppm): 114.8, 116.8, 120.7, 122.0, 123.2, 124.0, 126.4, 127.8, 128.2, 129.0, 131.8, 133.0, 135.2, 148.2.

**(b) 4-(2-(pyren-1-yl)-1H-phenanthro[9,10-d]imidazol-1-yl)naphthalene-1-carbonitrile (PPINC�)**

The synthetic procedure adopted was similar as that described for BrPPINC�. Yield: 80 %. <sup>1</sup>H NMR (400 MHz, CDCl<sub>3</sub>), δ (ppm): 7.32 (d, 2H), 7.48-7.56 (m, 6H), 7.60-7.96 (m, 6H), 8.05 (d, 2H), 8.20-8.46 (t, 5H), 8.78 (d, 2H) (Plate S1). <sup>13</sup>C NMR (100 MHz, CDCl<sub>3</sub>), δ (ppm): 109.1, 115.0, 119.8, 122.0, 123.4, 126.0, 127.2, 128.0, 129.1, 131.2, 132.0, 134.8, 139.0, 149.6. HR-MS (C<sub>42</sub>H<sub>23</sub>N<sub>3</sub>): m/z. 571.67 [M<sup>+</sup>], Calcd. 571.73. Anal. Calcd (%) for C, 88.50; H, 4.07; N, 7.38. Found: C, 88.45; H, 4.01; N, 7.31.

**(c) 4-(6,9-bis(4-(1,2,2-triphenylvinyl)phenyl)-2-(pyren-1-yl)-1H-phenanthro[9,10-d]imidazol-1-yl)naphthalene-1-carbonitrile (PPINC�-TPE)**

A mixture of BrPPINC� (2mmol), (4-(2,2-diphenylvinyl)phenyl)boronic acid (6 mmol), Pd(PPh<sub>3</sub>)<sub>4</sub> (0.4 mmol) and K<sub>2</sub>CO<sub>3</sub> (6 mmol) in mixed solvents toluene, ethanol and water (8:1:1) was refluxed for 12 h. After cooling, the mixture was poured into water and extracted twice with dichloromethane and dried. The residue was purified by silica gel column chromatography (petroleum ether/DCM, 1:1) and yellow solid of PPINC�-TPE was obtained. Yield: 69%. <sup>1</sup>H NMR (400 MHz, CDCl<sub>3</sub>), δ (ppm): 7.11 (s, 2H), 7.20 (s, 2H), 7.28-7.39 (m, 7H), 7.40-7.52 (m, 8H), 7.60-7.65 (m, 6H), 7.70 (d, 4H), 7.80 (d, 3H), 7.92-8.00 (m, 8H), 8.05-8.10 (m, 9H), 8.1-8.20 (t, 8H), 8.93 (s, 2H) (Plate S2). <sup>13</sup>C NMR (100 MHz, CDCl<sub>3</sub>), δ (ppm): 109.0, 112.8, 117.6, 119.8, 121.7, 123.1, 124.8, 125.6, 126.8, 127.3, 127.8, 128.0, 129.0, 129.2, 131.3, 132.8, 133.6, 134.0, 135.0, 142.08, 144.6, 146.7, 149.4. HR-MS (C<sub>94</sub>H<sub>59</sub>N<sub>3</sub>): m/z. 1232.51 [M<sup>+</sup>], Calcd. 1232.26. Anal. Calcd (%) for C, 91.50; H, 4.83; N, 3.14. Found: C, 91.45; H, 4.79; N, 3.08.

**(d) 4-(6,9-bis(4-(9H-carbazol-9-yl)phenyl)-2-(pyren-1-yl)-1H-phenanthro[9,10-d]imidazol-1-yl)naphthalene-1-carbonitrile (PPINC�-Cz)**

The synthetic procedure adopted was similar as that described for PPINC�-TPE by using (4-(9H-carbazol-9-yl)phenyl)boronic acid. Yield: 52%. <sup>1</sup>H NMR (400 MHz, CDCl<sub>3</sub>), δ

(ppm): 6.90-7.02 (m, 7H), 7.10-7.25 (m, 9H), 7.31-7.42 (m, 7H), 7.50-7.61 (m, 7H), 7.80 (d, 2H), 7.93 (d, 2H), 8.01-8.16 (m, 9H), 9.15 (s, 2H) (Plate S3).  $^{13}\text{C}$  NMR (100 MHz,  $\text{CDCl}_3$ ),  $\delta$  (ppm): 110.8, 111.6, 113.2, 115.0, 116.0, 118.2, 120.6, 123.9, 124.2, 126.8, 127.0, 128.2, 129.0, 131.8, 132.6, 133.1, 134.0, 136.8, 137.0, 139.3, 142.3. HR-MS ( $\text{C}_{78}\text{H}_{45}\text{N}_5$ ): m/z. 1053.24 [M<sup>+</sup>], Calcd: 1053.17. Anal. Calcd (%) for C, 89.30; H, 4.39; N, 6.76. Found: C, 88.97; H, 4.28; N, 6.60.

Scheme S1. Synthetic route of emissive materials.

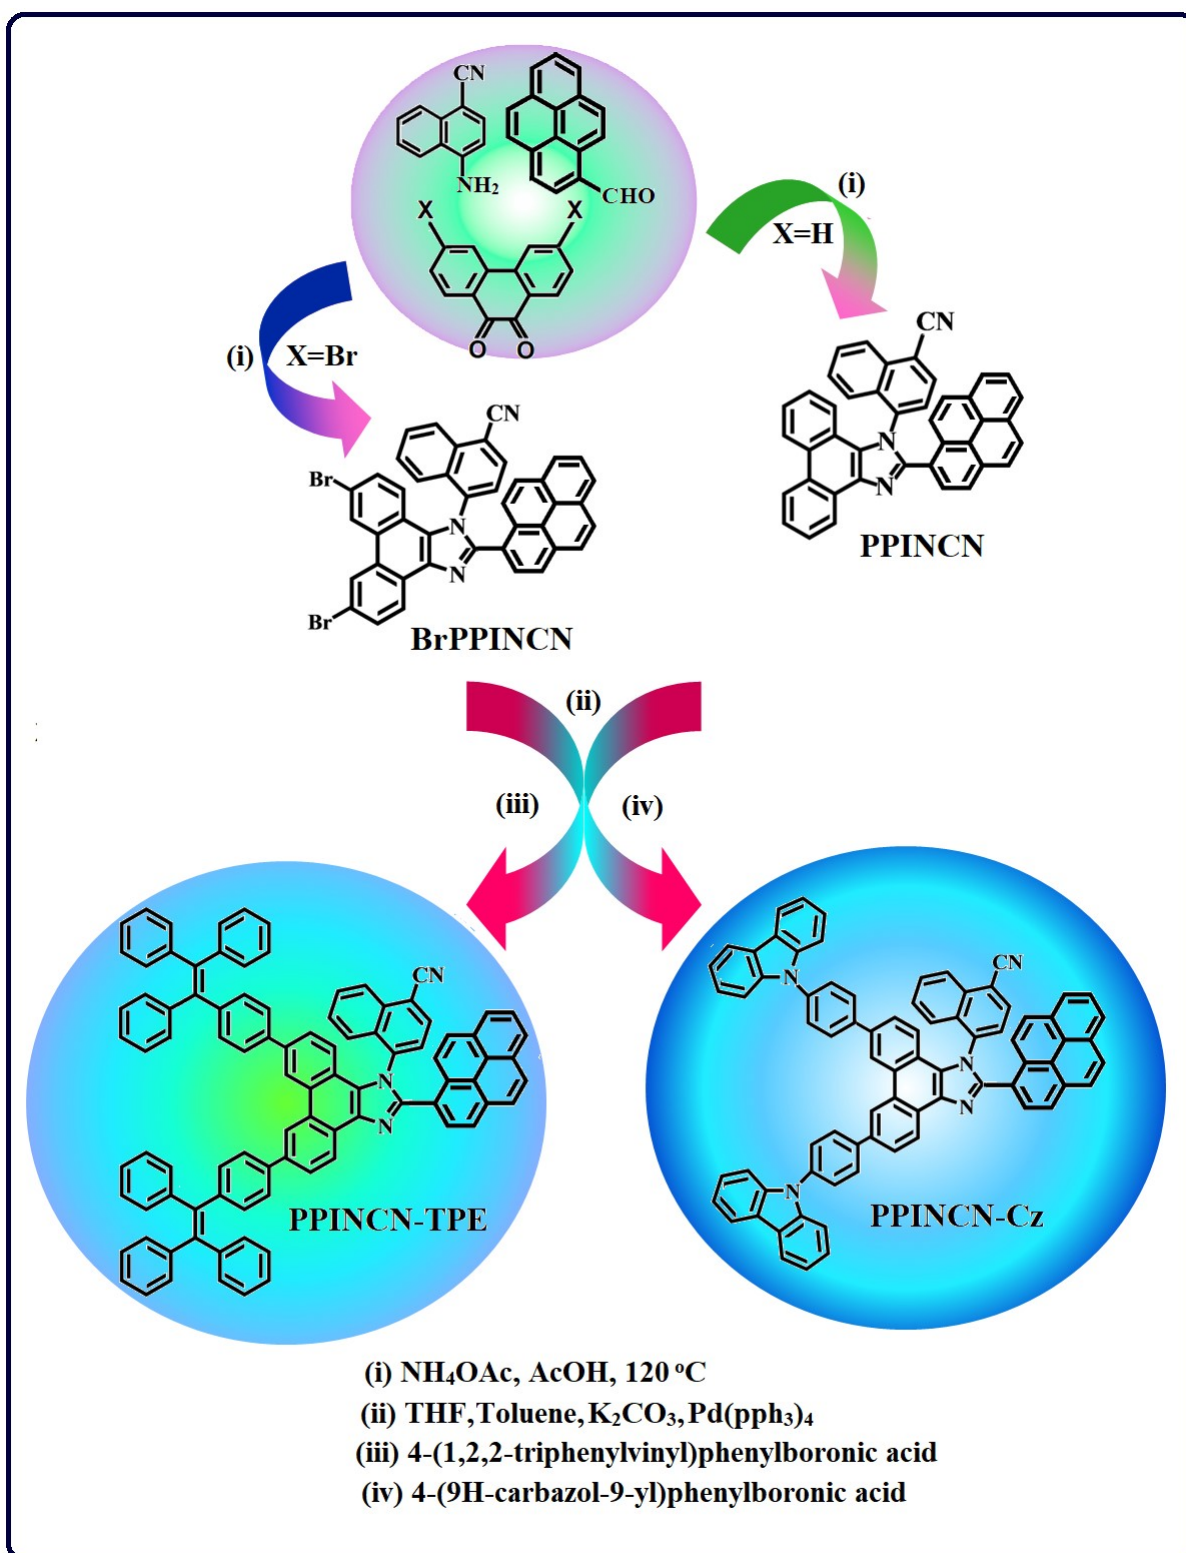



Plates S3. <sup>1</sup>H NMR spectrum of 4-(6,9-bis(4-(9H-carbazol-9-yl)phenyl)-2-(pyren-1-yl)-1H-phenanthro[9,10-d]imidazol-1-yl)naphthalene-1-carbonitrile (PPINCN-Cz).

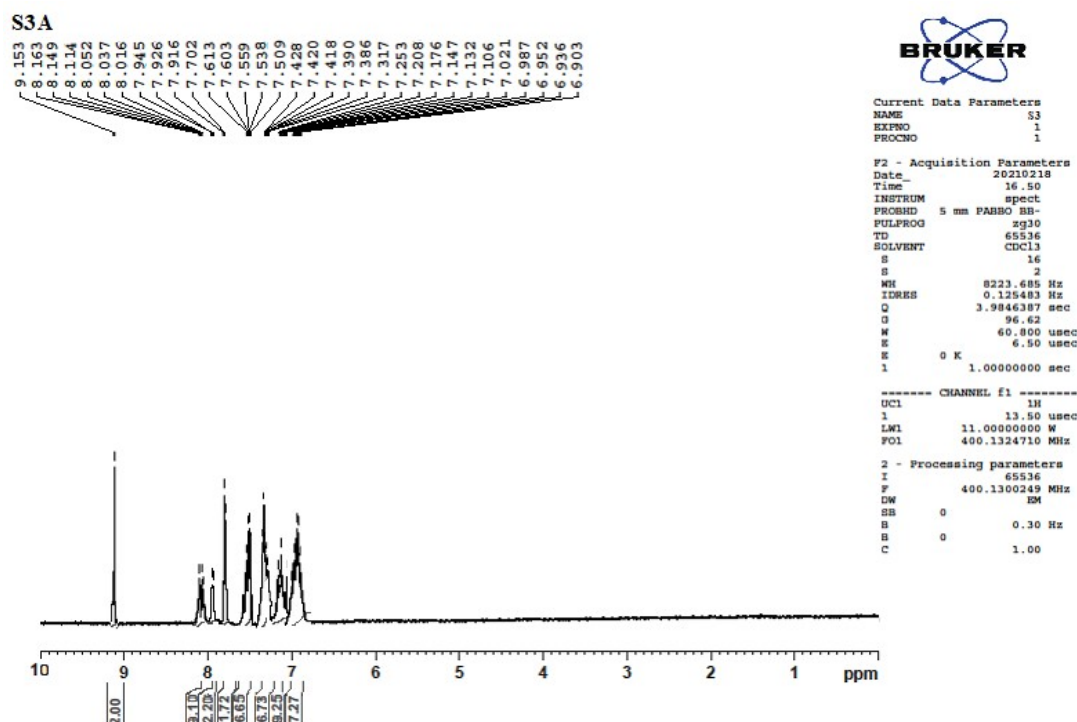

## SI-II: Charge-Transfer indexes

The hole-particle pair interactions have been related to the distance covered during the excitations. One possible descriptor or  $\Delta r$  index could be used to calculate the average distance which is weighted in function of the excitation coefficients.

$$\Delta r = \frac{\sum_{ia} k_{ia}^2 |\langle \varphi_a | r | \varphi_a \rangle - \langle \varphi_i | r | \varphi_i \rangle|}{\sum_{ia} K_{ia}^2} \dots\dots\dots (S1)$$

where,  $|\langle \varphi_i | r | \varphi_i \rangle|$  is the norm of the orbital centroid [2–5].  $\Delta r$ -index will be expressed in Å.

The density variation associated to the electronic transition is given by

$$\Delta \rho(r) = \rho_{EX}(r) - \rho_{GS}(r) \dots\dots\dots (S2)$$

where,  $\rho_{GS}(r)$  and  $\rho_{EX}(r)$  are the electronic densities of ground and excited states, respectively. Two functions,  $\rho_+(r)$  and  $\rho_-(r)$  corresponds to the points in space where an



increment or a depletion of the density upon absorption is produced and they can be defined as follows:

$$\rho_+(r) = \begin{cases} \Delta\rho(r) & \text{if } \Delta\rho(r) > 0 \\ 0 & \text{if } \Delta\rho(r) < 0 \end{cases} \dots\dots\dots (S3)$$

$$\rho_-(r) = \begin{cases} \Delta\rho(r) & \text{if } \Delta\rho(r) < 0 \\ 0 & \text{if } \Delta\rho(r) > 0 \end{cases} \dots\dots\dots (S4)$$

The barycenters of the spatial regions  $R_+$  and  $R_-$  are related with  $\rho_+(r)$  and  $\rho_-(r)$  and are shown as,

$$R_+ = \frac{\int r\rho_+(r)dr}{\int \rho_+(r)dr} = (x_+, y_+, z_+) \dots\dots\dots (S5)$$

$$R_- = \frac{\int r\rho_-(r)dr}{\int \rho_-(r)dr} = (x_-, y_-, z_-) \dots\dots\dots (S6)$$

The spatial distance ( $D_{CT}$ ) between the two barycenters  $R_+$  and  $R_-$  of density distribution scan thus, be used to measure the CT excitation length

$$D_{CT} = |R_+ - R_-| \dots\dots\dots (S7)$$

The transferred charge ( $q_{CT}$ ) can be obtained by integrating over all space  $\rho_+(\rho_-)$ ,. Variation in dipole moment between the ground and the excited states ( $\mu_{CT}$ ) can be computed by the following relation:

$$\|\mu_{CT}\| = D_{CT} \int \rho_+(r)dr = D_{CT} \int \rho_-(r)dr \dots\dots\dots (S8)$$

$$= D_{CT}q_{CT} \dots\dots\dots (S9)$$

The difference between the dipole moments  $\|\mu_{CT}\|$  have been computed for the ground and the excited states ( $\Delta\mu_{ES-GS}$ ). The two centroids of charges ( $C^+/C^-$ ) associated to the positive

and negative density regions are calculated as follows: First the root-mean-square deviations along the three axis ( $\sigma_{aj}$ ,  $j = x, y, z$ ;  $a = +$  or  $-$ ) are computed as,

$$\sigma_{a,j} = \sqrt{\frac{\sum_i \rho_a(r_i)(j_i - j_a)^2}{\sum_i \rho_a(r_i)}} \dots\dots\dots (S10)$$

The two centroids ( $C_+$  and  $C_-$ ) are defined as,

$$C_+(r) = A_+ e\left(-\frac{(x - x_+)^2}{2\sigma_{+x}^2} - \frac{(y - y_+)^2}{2\sigma_{+y}^2} - \frac{(z - z_+)^2}{2\sigma_{+z}^2}\right) \dots\dots\dots (S11)$$

$$C_-(r) = A_- e\left(-\frac{(x - x_-)^2}{2\sigma_{-x}^2} - \frac{(y - y_-)^2}{2\sigma_{-y}^2} - \frac{(z - z_-)^2}{2\sigma_{-z}^2}\right) \dots\dots\dots (S12)$$

The normalization factors ( $A_+$  and  $A_-$ ) are used to impose the integrated charge on the centroid to be equal to the corresponding density change integrated in the whole space:

$$A_+ = \frac{\int \rho_+(r) dr}{\int e\left(-\frac{(x - x_+)^2}{2\sigma_{+x}^2} - \frac{(y - y_+)^2}{2\sigma_{+y}^2} - \frac{(z - z_+)^2}{2\sigma_{+z}^2}\right) dr} \dots\dots\dots (S13)$$

$$A_- = \frac{\int \rho_-(r) dr}{\int e\left(-\frac{(x - x_-)^2}{2\sigma_{-x}^2} - \frac{(y - y_-)^2}{2\sigma_{-y}^2} - \frac{(z - z_-)^2}{2\sigma_{-z}^2}\right) dr} \dots\dots\dots (S14)$$

H index is defined as half of the sum of the centroids axis along the D-A direction, if the D-A direction is along the X axis, H is defined by the relation:

$$H = \frac{\sigma_{+x} + \sigma_{-x}}{2} \dots\dots\dots (S15)$$

The centroid along X axis is expected. The t index represents the difference between  $D_{CT}$  and H:

$$t = D_{CT} - H \dots\dots\dots (S16)$$

**Figure S1. Natural transition orbital pairs (HONTOs and LUNTOs) with transition character for singlet states ( $S_1$ - $S_5$ ) and triplet states ( $T_1$ - $T_5$ ) of PPINCN [ $f$ -oscillator strength and % weights of hole-particle].**

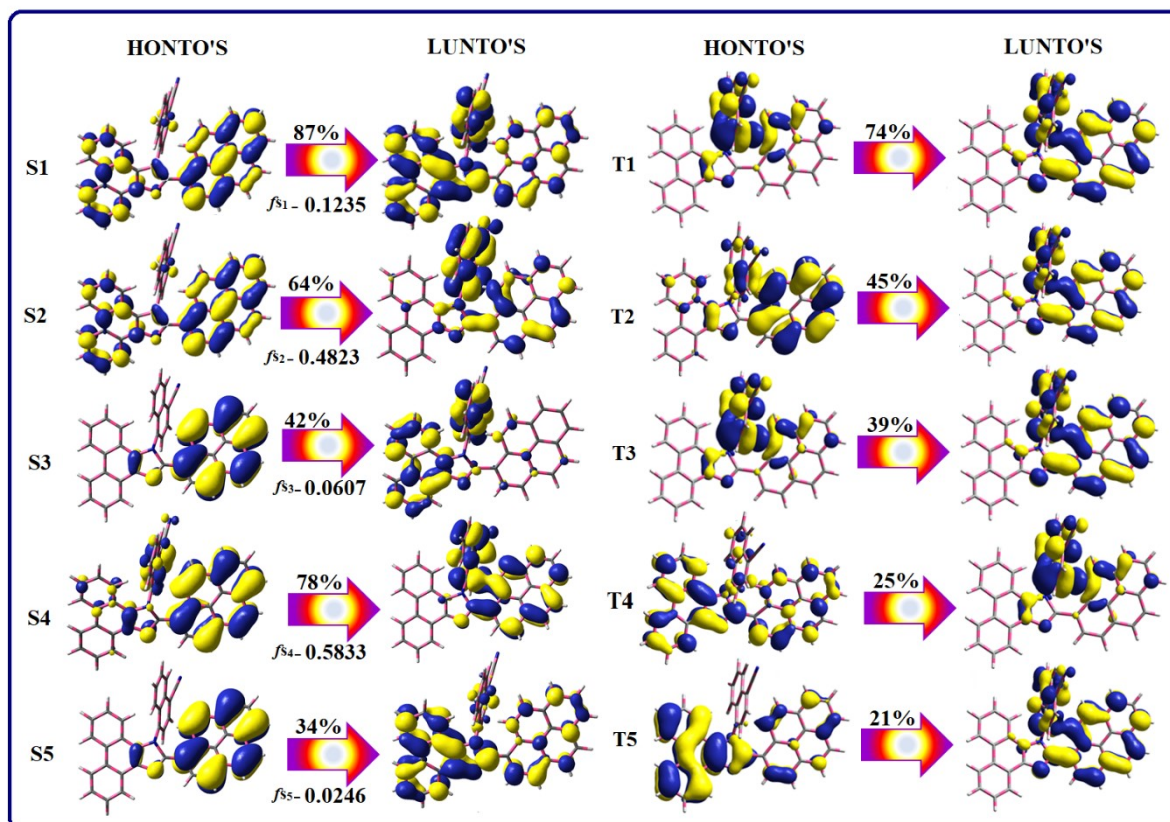

Figure S2. Natural transition orbital pairs (HONTOs and LUNTOs) with transition character for singlet states ( $S_1$ - $S_5$ ) and triplet states ( $T_1$ - $T_5$ ) of PPINCN-TPE [ $f$ -oscillator strength and % weights of hole-particle].

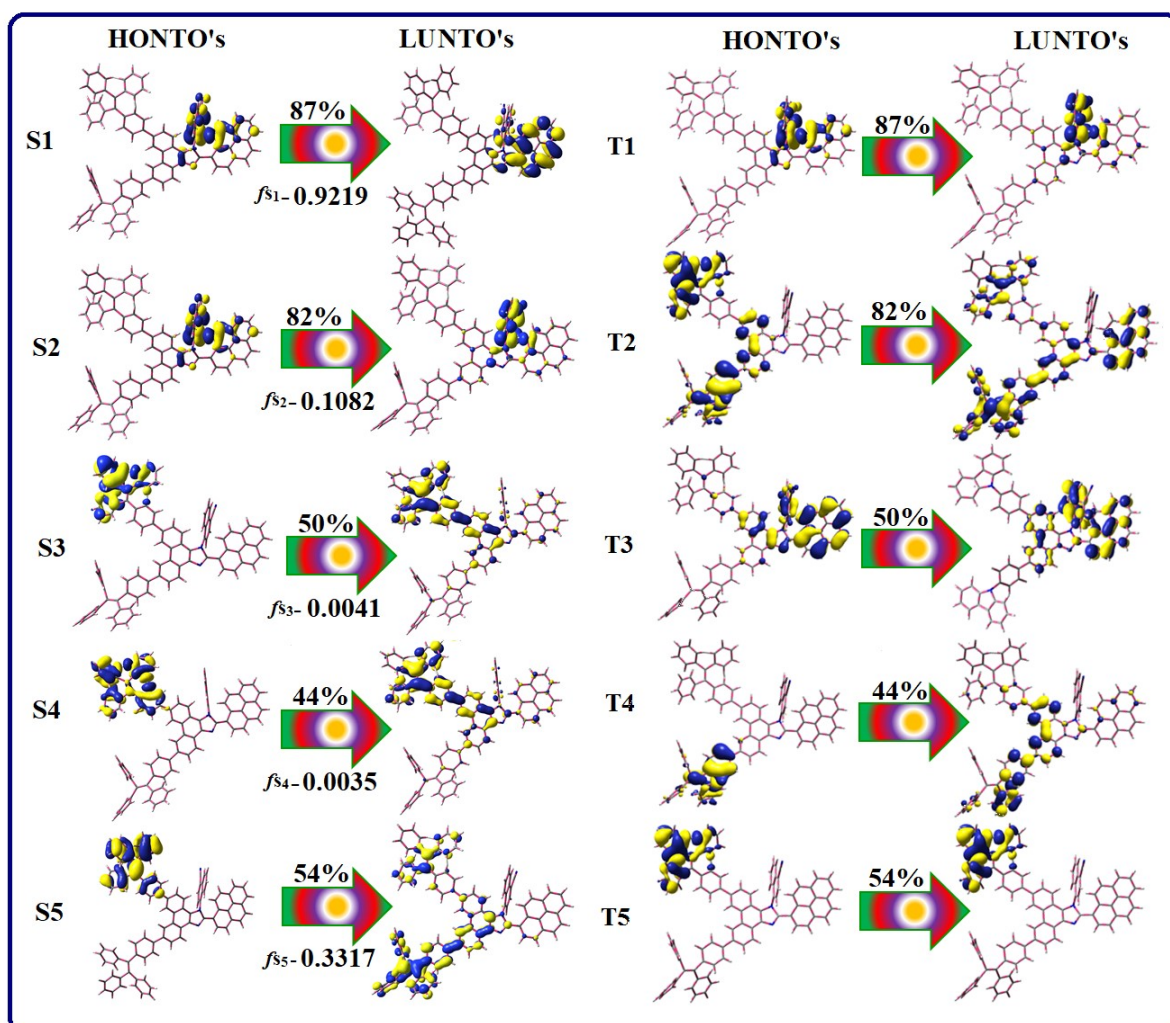

Figure S3. Emission spectra and UV illumination of (a) PPINCN; (b) PPINCN-TPE and (c) PPINCN-Cz in THF-H<sub>2</sub>O mixture with different water fractions and (d) ML and PL spectra.

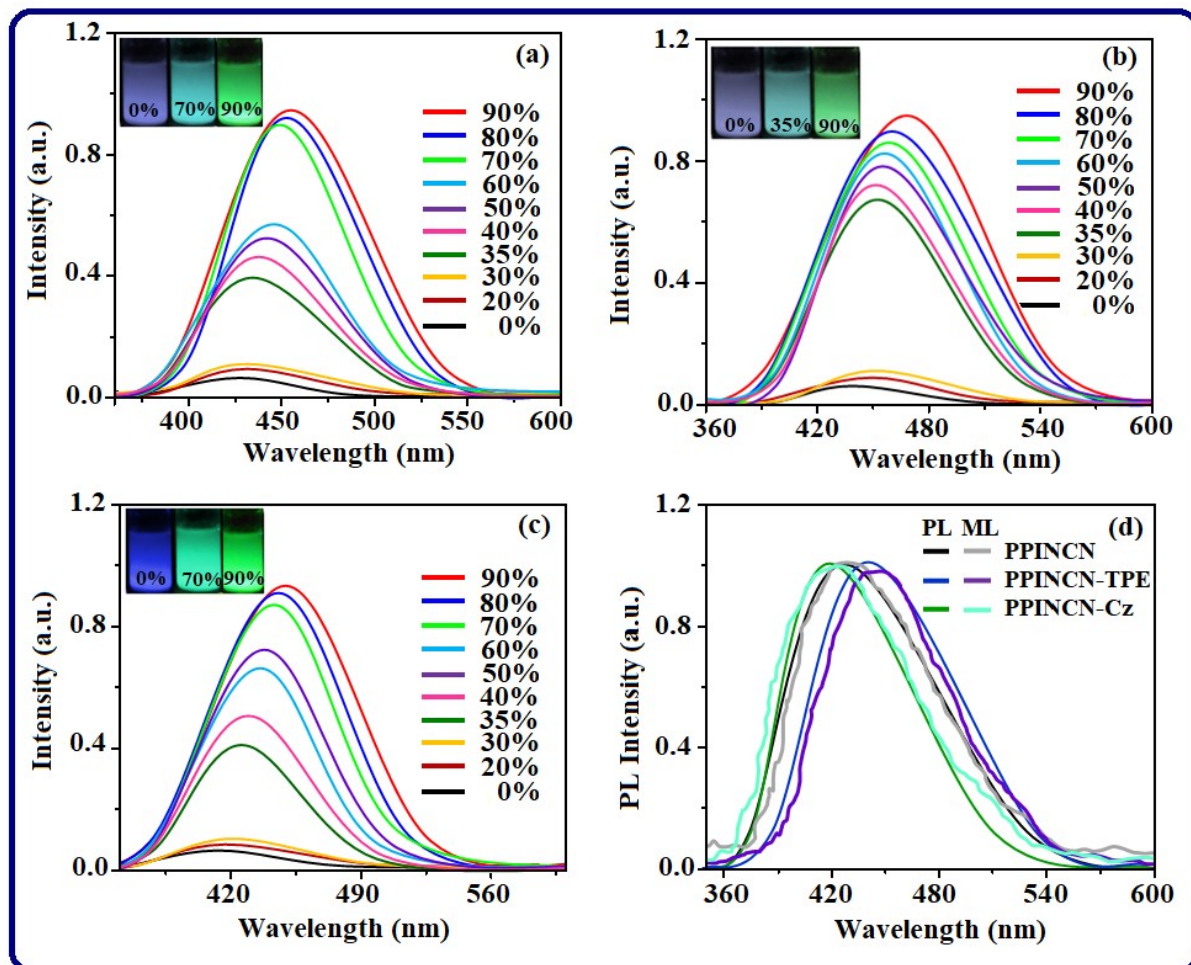

Figure S4. (a) Optimised geometry with dihedral angles, HOMO-LUMO orbitals and net dipolemoment of couples I-III of PPINCN and (b) Intermolecular interactions of couples I-III of PPINCN.

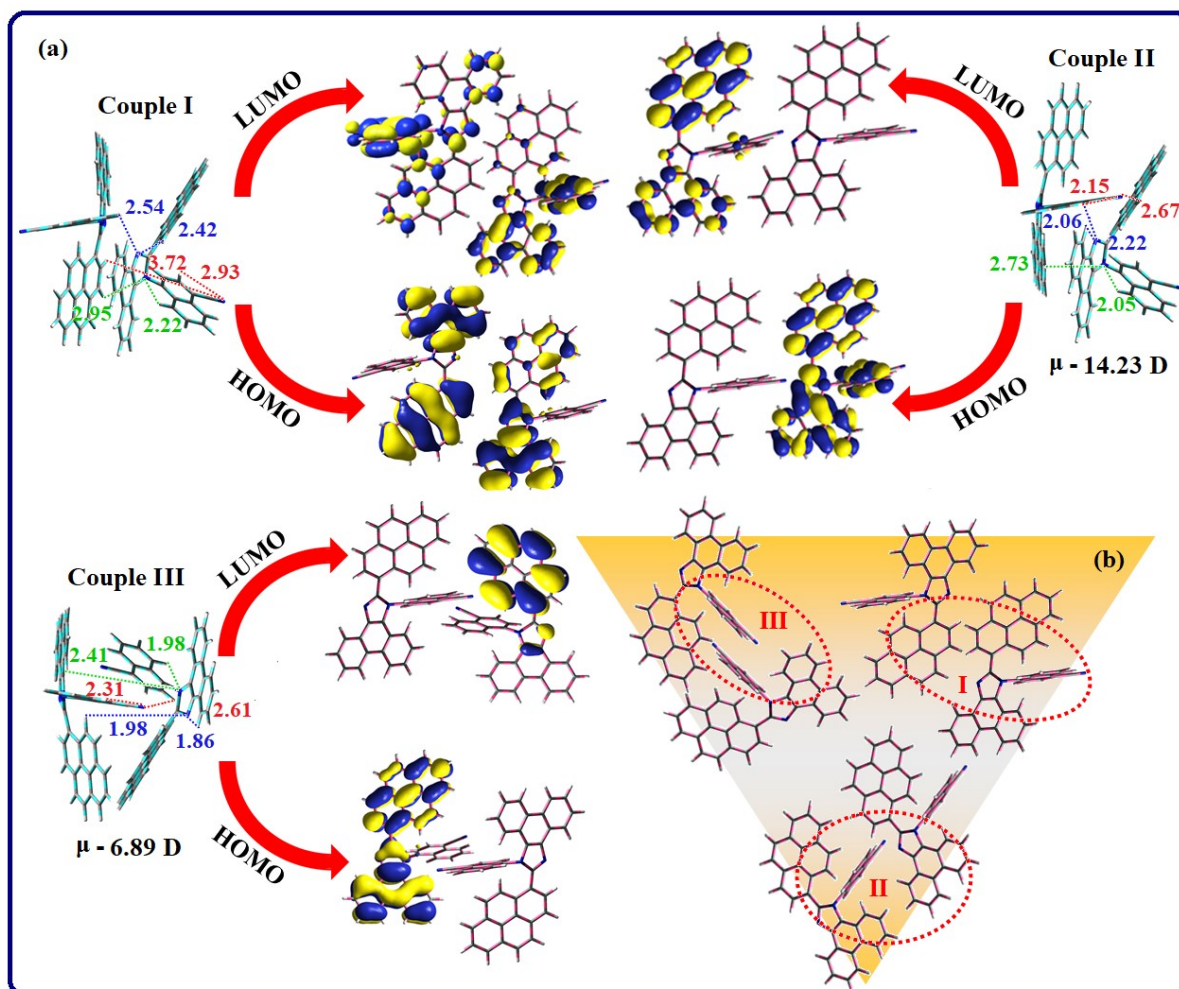

Figure S5. (a) Optimised geometry with dihedral angles, HOMO-LUMO orbitals and net dipolemoment of couples I-III of PPINCN-TPE and (b) Intermolecular interactions of couples I-III of PPINCN-TPE.

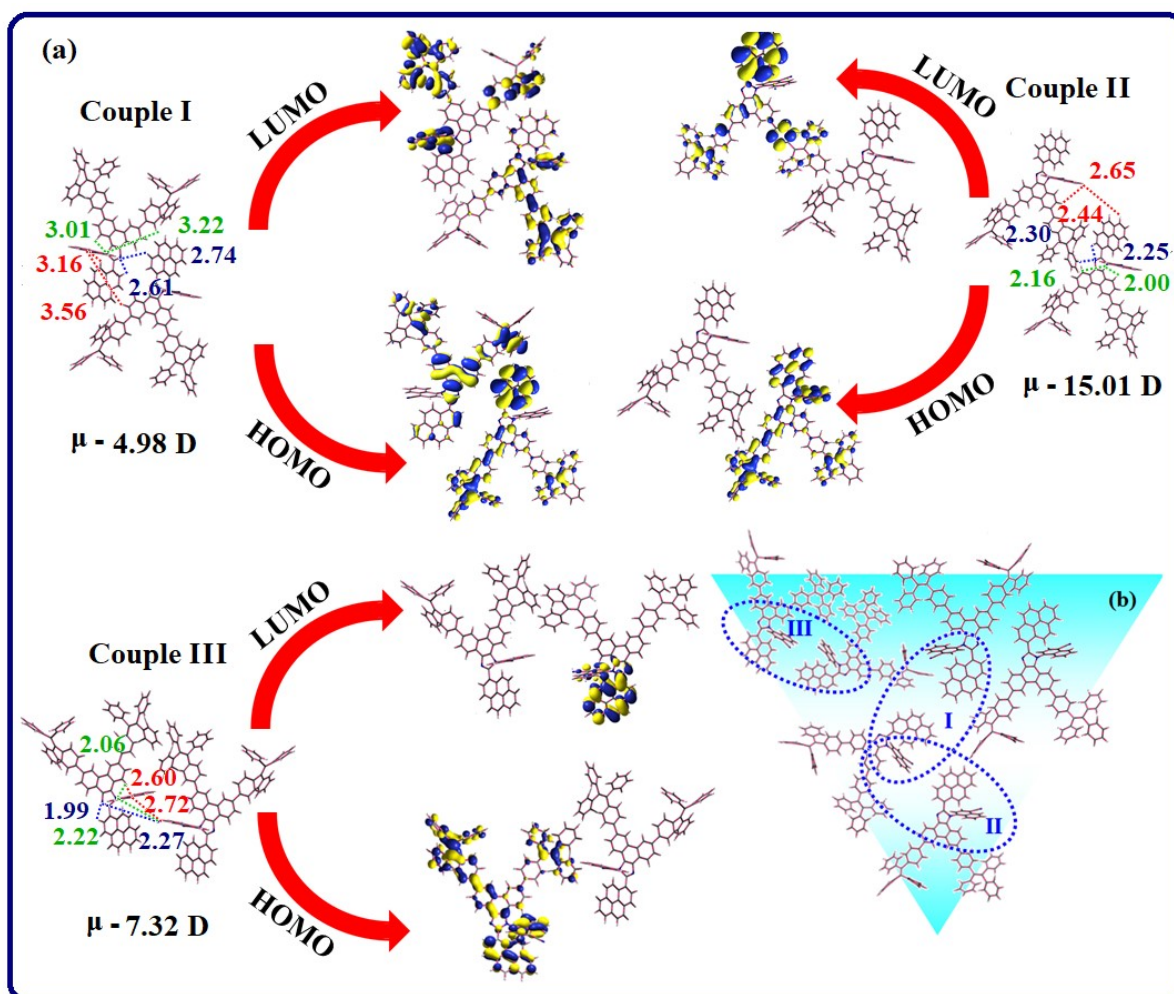

### SI-III: (a) Solvatochromism for HLCT character

The solvatochromic effect using Lippert-Mataga plot has been displayed in Figure S6. As the solvent polarity increased the blue emitters exhibit a larger red shift which supports the charge transfer (CT). From Lippert-Mataga plot, the ground state dipolemoment ( $\mu_g$ ) can be calculated:  $hc(\tilde{\nu}_{abs} - \tilde{\nu}_{flu}) = hc(hc\tilde{\nu}_{abs}^{vac} - hc\tilde{\nu}_{flu}^{vac}) + 2(\mu_e - \mu_g)^2 / a_o^3 [(\epsilon - 1/2\epsilon + 1) - 1/2(n^2 - 1/2n^2 + 1)]$  [ $\mu_g$  and  $\mu_e$  - ground state and excited state dipolemoment,  $\tilde{\nu}_{abs}$  and  $\tilde{\nu}_{abs}^{vac}$  - solvent-equilibrated absorption maxima ( $\lambda_{abs}$ ) and extrapolated to gas phase,  $\tilde{\nu}_{flu}$  and  $\tilde{\nu}_{flu}^{vac}$  - solvent equilibrated fluorescence maxima ( $\lambda_{emi}$ ) and extrapolated to gas-phase, respectively,  $a_o$  - Onsager cavity and  $\epsilon$  and  $n$  solvent dielectric constant and refractive index, respectively]. The non-linear correlation of Stokes shift vs solvent polarity function reveal that transformation of fitted line between ethyl ether and methylene chloride: non-linear correlation supports the presence of both locally excited state (LE) and charge transfer excited state (CT). All these results show that CT dominates in more polar medium and LE dominates in low polar solvent and there is mixed contribution of LE and CT in medium polar solvents.

The optical characteristics of emissive materials were studied in solution as well as solid by absorption and emission studies. When cyano group is incorporated, the modification in charge-transfer state red-shifted the absorption and emission. The CN group rarely influences the electronic properties as well as band-gap. It is in accordance with quantum chemical calculations. The emission peak was red shifted as increasing the solvent polarity because of polarization induced optical shift (Figure S6). The PL spectra gradually widened indicates that their excited state have strong CT character when compared to ground state and further stabilized by polar solvents.



Figure S6. Solvatochromism: (a) absorption and (b) emission spectra of PPINCN, PPINCN-TPE and PPINCN-Cz.

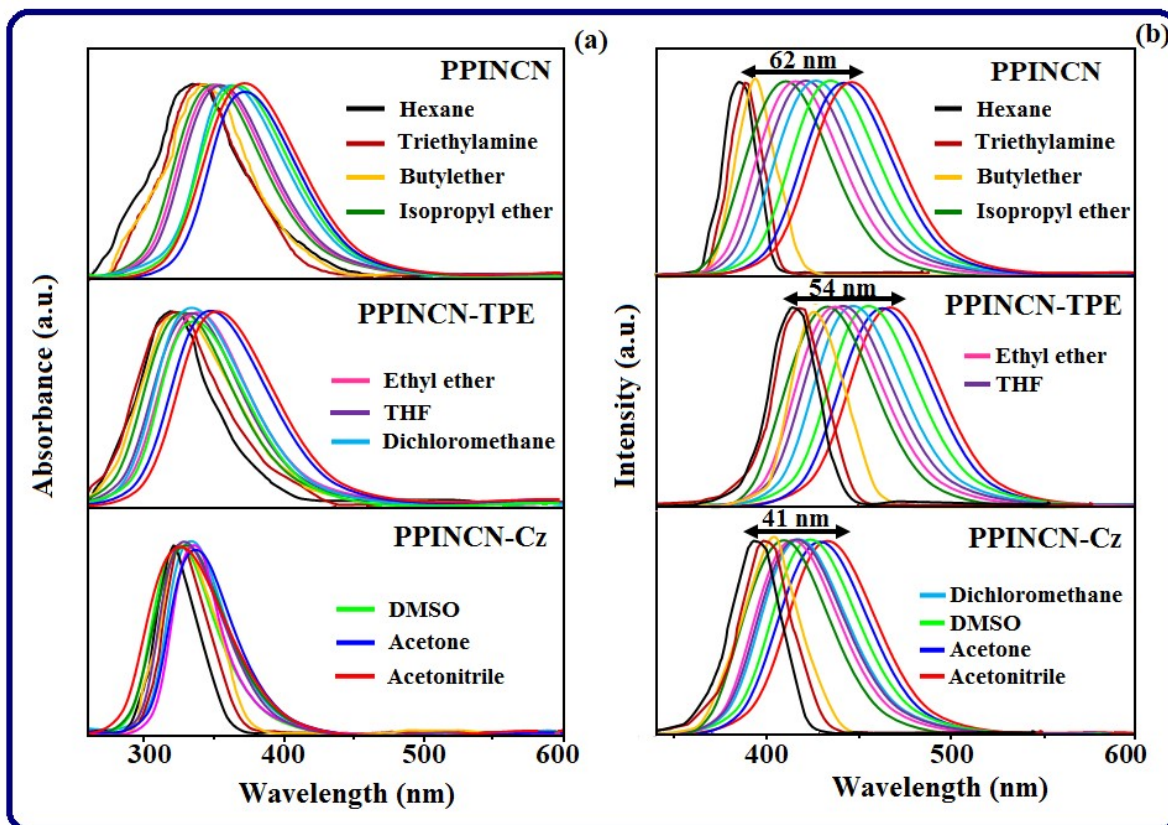

### (b) Transition density matrix (TDM) plot

The existence of LE and CT states can be discussed from wave function of electron-hole pairs transition density matrix (TDM) plot. The diagonal region represents LE component and off-diagonal region shows CT component. Upon excitation, electron transferred from donor and localized on acceptor: depending upon intramolecular geometrical and electronic coupling, transferred electron delocalized from the region of nearby donor to the vicinity of acceptor. This effect can be qualitatively studied by analyzing electron density distribution at ground and excited states. Computed electron-hole properties, distance between hole and electron, transition density, H and t indexes and RMSD of electron and hole of these emitters are displayed in Tables S10-S12.

The integral value of hole and electron with transition density have been shown in Tables S7 - S9. The integral overlap of hole-electron distribution (S) is a measure of spatial separation of hole and electron. The integral overlap (S) of hole and electron and distance (D) between centroids of hole and electron proved the existence of LE and CT states. These emitters show small S and high D, indicates higher charge transfer (CT) variation of dipolemoment with respect to  $S_0$  state. These values are directly evaluated based on the position of centroid of hole and electron. RMSD of hole or electron characterizes their distribution breadth: RMSD of both electron and hole is higher in X direction indicates electron and hole distribution is much broader in Y and Z directions (Tables S10-S12). The overlap between the region of density depletion and increment have been visualised by using two centroids of charges (equations S9 and S10). The H and t indexes for PPINCN, PPINCN-TPE and PPINCN-Cz are tabulated (Tables S10-S12). The CT index, *i.e.* index difference between  $D_{CT}$  and H index is another measure of the separation of hole-electron (equations S15 and S16). The  $D_{CT}$  of PPINCN, PPINCN-TPE and PPINCN-Cz has been calculated to be 0.054/4.677/0.125, respectively and the calculated  $H/t$  indexes are of PPINCN (4.402/4.355),

PPINCN-TPE (4.885/2.199) and PPINCN-Cz (6.990/6.882) (Figure S12 and Table S13). For PPINCN, PPINCN-TPE and PPINCN-Cz, the non-zero  $t$  is negative in all directions: overlap of hole and electron is very severe and eigen value is greater than 0.96, supports the hybridization and described in terms of dominant excitation pair in terms of 94 % of transition.

The hybridization of these materials have been further evidenced by  $\Delta r$  index (Tables S4 & S6). The  $\Delta r$  index (equation S1) is average of hole ( $h^+$ )-electron ( $e^-$ ) distance ( $d_{h^+ \cdot e^-}$ ) upon excitation which indicates the nature of excitation type, LE or CT: valence excitation (LE) is related to short distances ( $d_{h^+ \cdot e^-}$ ) while larger distances ( $d_{h^+ \cdot e^-}$ ) related to CT excitation. The triplet exciton is transformed to singlet exciton *via* RISC process with high energy excited state (hot CT channel) which are beneficial for triplet exciton conversion in electroluminescence process without delayed fluorescence [6, 7]. The CT excitons have been formed with weak binding energy ( $E_b$ ) on higher excited states [8, 9]. As a result, the exciton utilization can be harvested in PPINCN, PPINCN-TPE and PPINCN-Cz like phosphorescent materials. The hybridization between LE and CT components leads to high EUE and enhanced OLEDs performances (Table 3) [9].

Figure S7. Contour plot of transition density matrices (TDM) with hole and particle distribution [green - increasing electron density and blue- decreasing electron density] of PPINCN [ $S_1$ - $S_3$  states: density = transition =  $n / \text{IOp}(6/8=3)$ ].

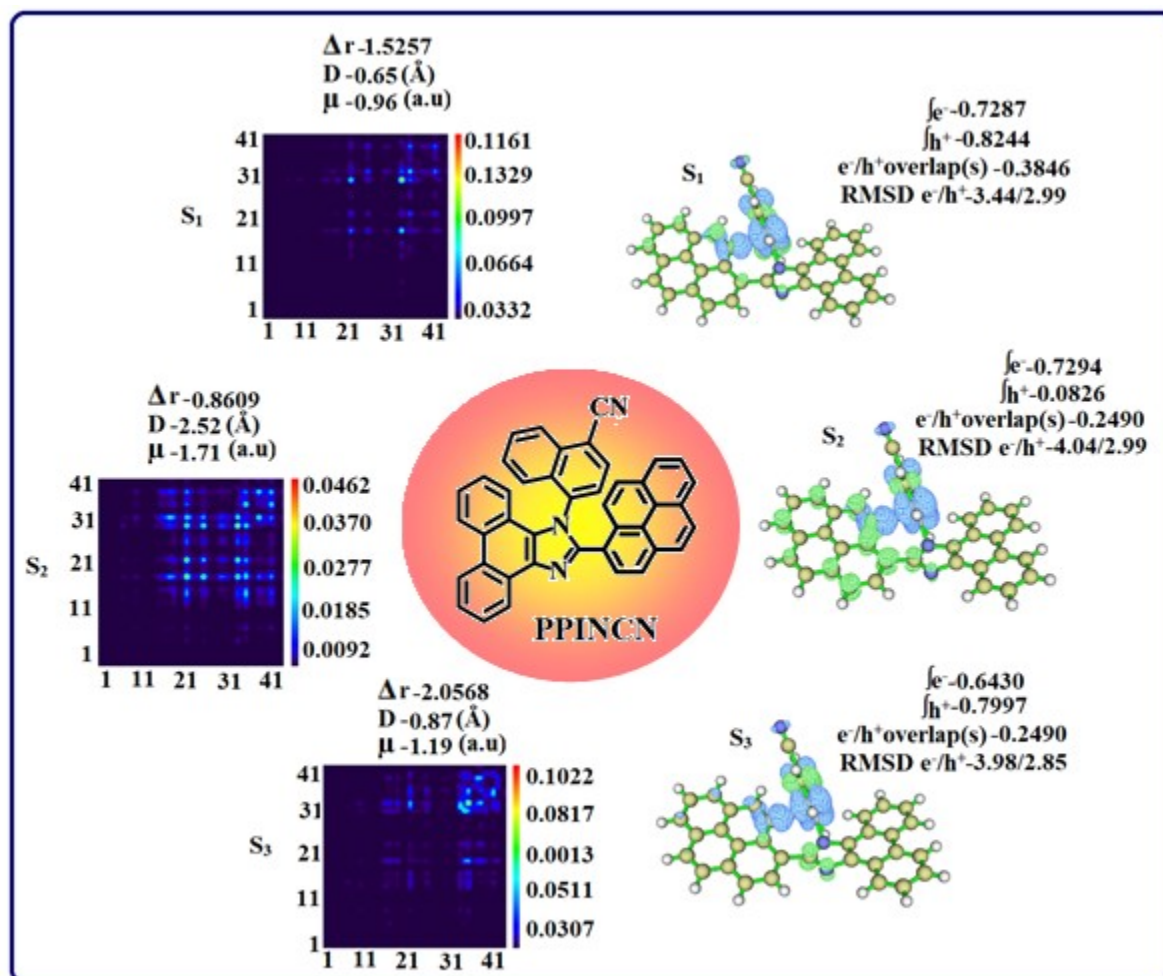

**Figure S8.** Contour plot of transition density matrices (TDM) and hole and particle distribution [green - increasing electron density and blue- decreasing electron density] of PPINCN-TPE [ $S_1$ - $S_3$  states: density = transition =  $n / IOp(6/8=3)$ ].

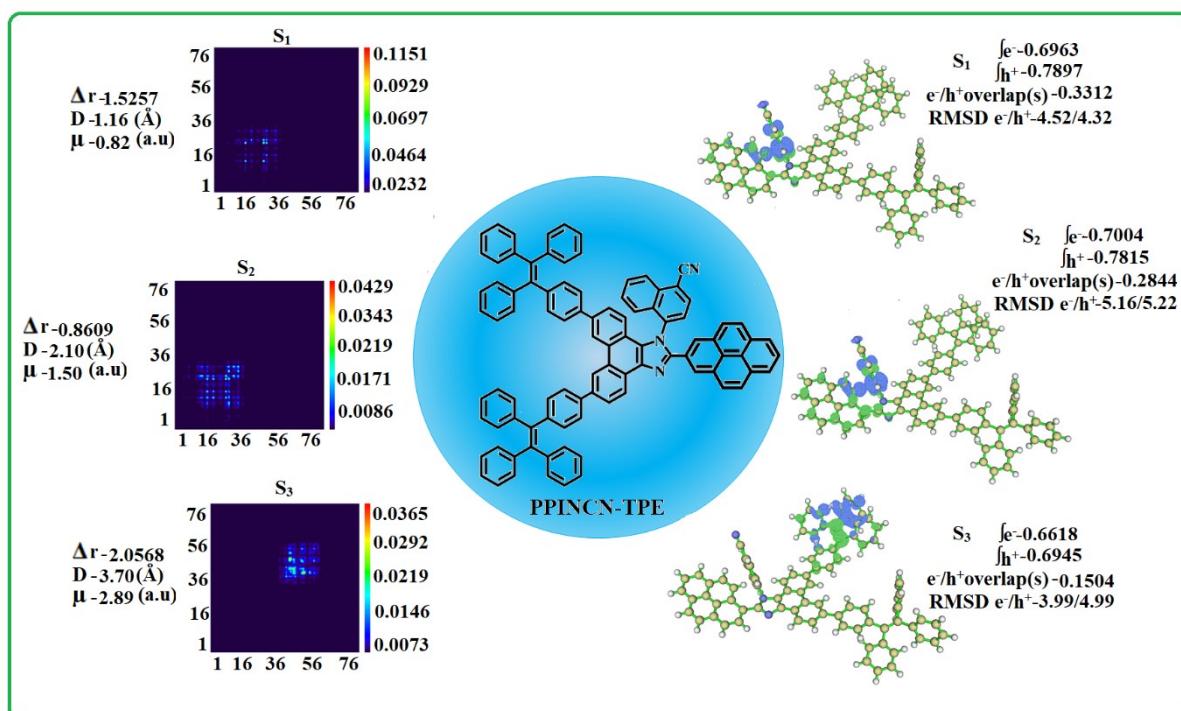

**Figure S9.** Contour plot of transition density matrices (TDM) and hole and particle distribution [green - increasing electron density and blue- decreasing electron density] of PPINCN-Cz [S<sub>1</sub>-S<sub>3</sub> states: density = transition = n /IOp(6/8=3)].

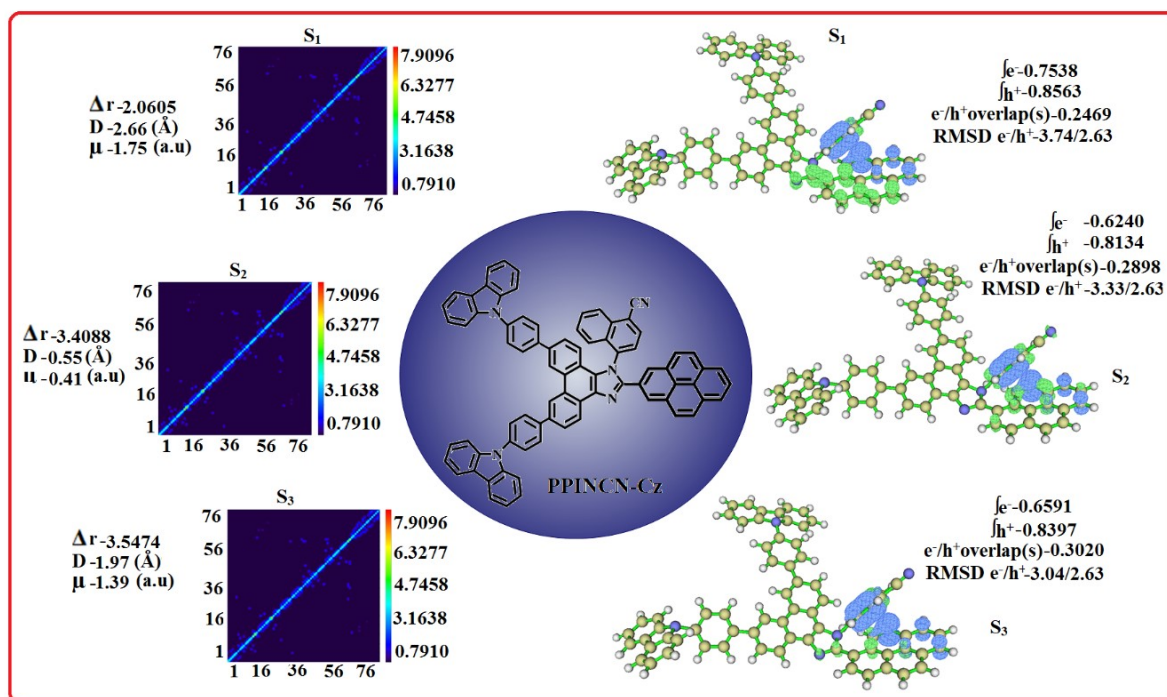

### (c) Hot exciton mechanism

The interstate hybridization coupling between LE and CT state wave function are of  $\Psi_{S_1/S_2} = c_{LE} \cdot \Psi_{LE} \pm c_{CT} \cdot \Psi_{CT}$ . The % CT of these emitters increases as increasing the aromatic fragment size and also partially influenced by steric hindrance. The % LE in S<sub>1</sub> state, these emitter's exhibit higher photoluminance efficiency ( $\eta_{PL}$ ) and high lying CT state increased the EUE (Figure 9). Therefore, degree of hybridization between LE and CT states depends not only initial  $E_{LE} - E_{CT}$  energy gap but also their interstate coupling strength [10]. Especially, the large energy differences of the initial LE and CT states in PPINCN and PPINCN-TPE lead to non-equivalent hybridization between LE and CT states, whereas the isoenergetic LE and CT states of PPINCN-TPE belongs to quasi-equivalent hybridization. The vertical excitation energies for the pure LE state were obtained for the corresponding conjugated molecular backbone by replacing the cyano group with hydrogen atoms and the

vertical excitation energy of pure CT state were roughly estimated according to the energy conservation ( $E_{S1} + E_{S2} = E_{LE} + E_{CT}$ ).

In hot exciton mechanism, the core concept is increasing the rate of  $k_{hRISC}$  ( $k_{hRISC}$ ) from  $T_n$  ( $n \geq 2$ ) to  $S_m$  ( $m \geq 1$ ), while decreasing the rate of internal conversion ( $k_{IC}$ ) from  $T_n$  ( $n \geq 2$ ) to  $T_1$ . When  $k_{hRISC} \gg k_{IC}$ , the non-radiative triplet excitons could be fully converted into radiative singlet excitons, resulting in improvement of device efficiency. According to Fermi's golden rule [5],  $k_{hRISC}$  depends on  $\Delta E_{ST}$  and spin-orbit coupling (SOC), as expressed in formula S17

$$k_{hRISC} \propto \left| \frac{\langle \Psi_{S_m} | \hat{H}_{SO} | \Psi_{T_n} \rangle}{\Delta E_{S_m T_n}} \right|^2 \quad (m \geq 1, n \geq 2) \dots \dots \dots S17$$

in which  $\Psi_{T_n}$  and  $\Psi_{S_m}$  represent the wave functions of initial ( $T_n$ ,  $n \geq 2$ ) and final ( $S_m$ ,  $m \geq 1$ ) states of  $k_{hRISC}$ , respectively,  $\hat{H}_{SO}$  is the operator for SOC  $\langle \Psi_{S_m} | \hat{H}_{SO} | \Psi_{T_n} \rangle$  and represent the SOC matrix element and the energy difference between  $T_n$  and  $S_m$ ,  $\Delta E_{S_m T_n}$ . Therefore, increasing  $k_{hRISC}$  from  $T_n$  to  $S_m$  requires small  $\Delta E_{S_m T_n}$  and large SOC. On the other hand,  $k_{IC}$  can be expressed by using the following formula S18 [6]

$$k_{IC} \propto \left| \frac{\langle \Psi_{T_n} | \hat{T}_N | \Psi_{T_1} \rangle}{\Delta E_{T_n T_1}} \right|^2 \quad (n \geq 2) \dots \dots \dots S18$$

where,  $\Psi_{T_n}$  and  $\Psi_{T_1}$  represent the wave functions of high-lying ( $T_n$ ,  $n \geq 2$ ) and low-lying triplet states of IC process, respectively,  $\hat{T}_N$  is the electronic operator describing the coupling energy gap between  $T_n$  and  $T_1$  states. In consequence, decreasing  $k_{IC}$  from  $T_n$  to  $T_1$  requires poor electronic coupling factor and large  $\Delta E_{T_n T_1}$ .

Usually, a large energy gap between the initial and final state plays a critical role in the slow

$k_{IC}$ . So, three positive factors including large  $\Delta E_{T_n T_1}$ , small  $\Delta E_{S_m T_1}$  and large

$\langle \Psi_{S_m} | \hat{T}_{S_0} | \Psi_{T_n} \rangle$  are liable to achieve efficient OLEDs with “hot exciton” mechanism.

**Figure S10. (a) Current density-electric field intensity curve of single carrier devices and Energy level diagram of (b) Non-doped; (c) Doped devices and (d) Doped devices with 2CNQTPA.**

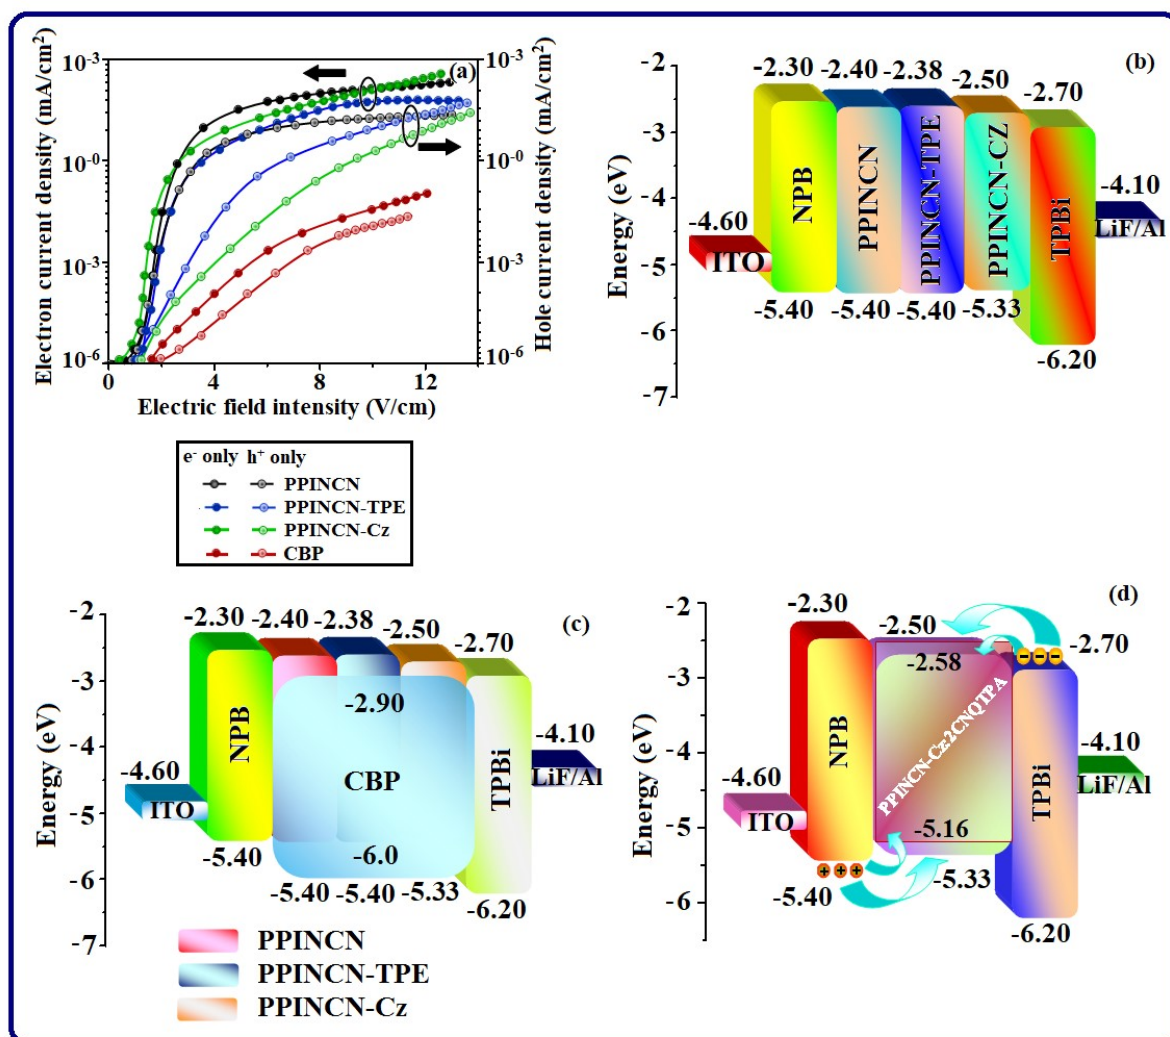



**Figure S11. PL spectra of emissive materials in different voltages.**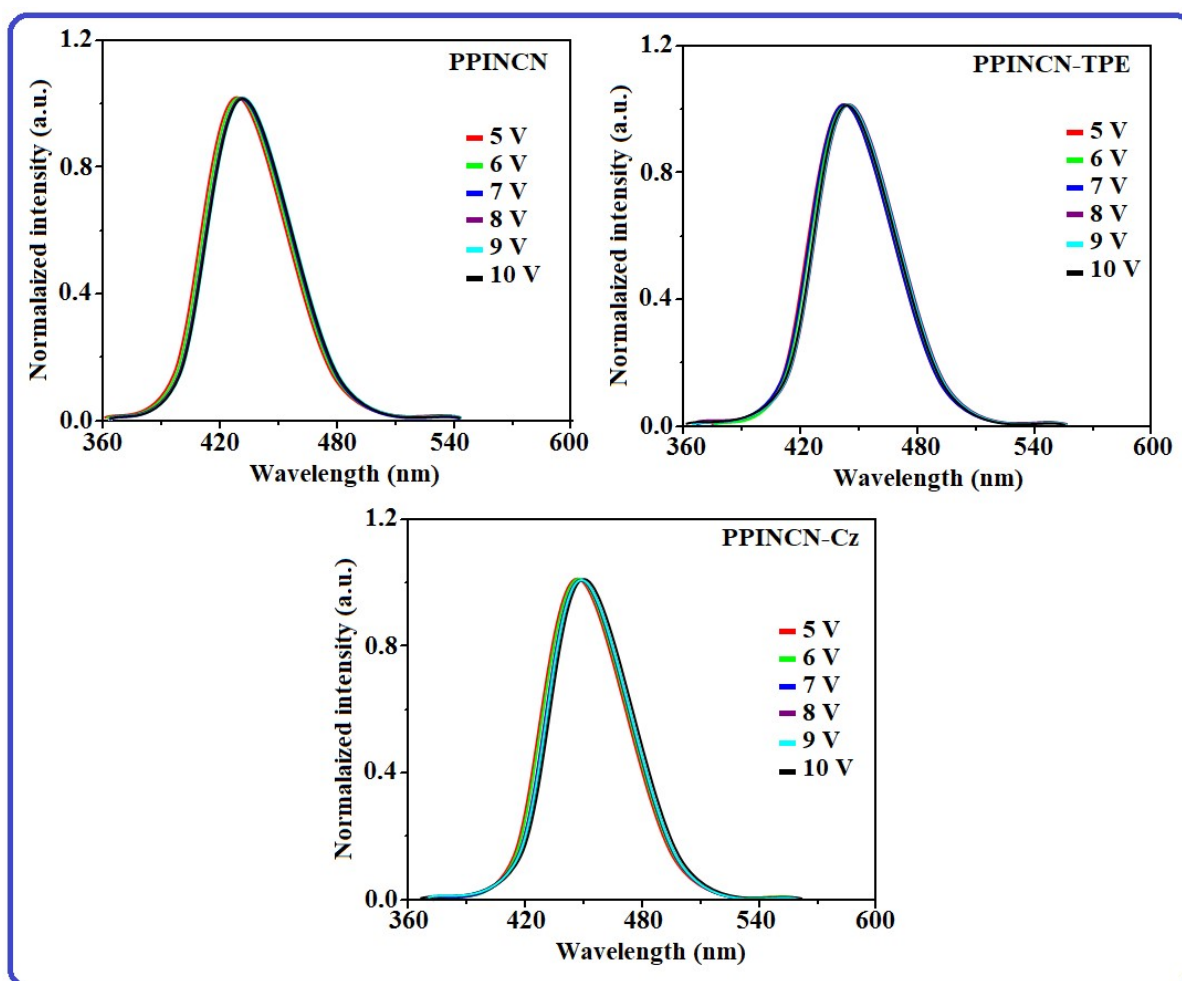

Figure S12. (a) Current-density-luminance curves of device PPINCN, PPINCN-TPE and PPINCN-Cz and (b) Transient decay spectra of PPINCN, PPINCN-TPE and PPINCN-Cz in neat films.

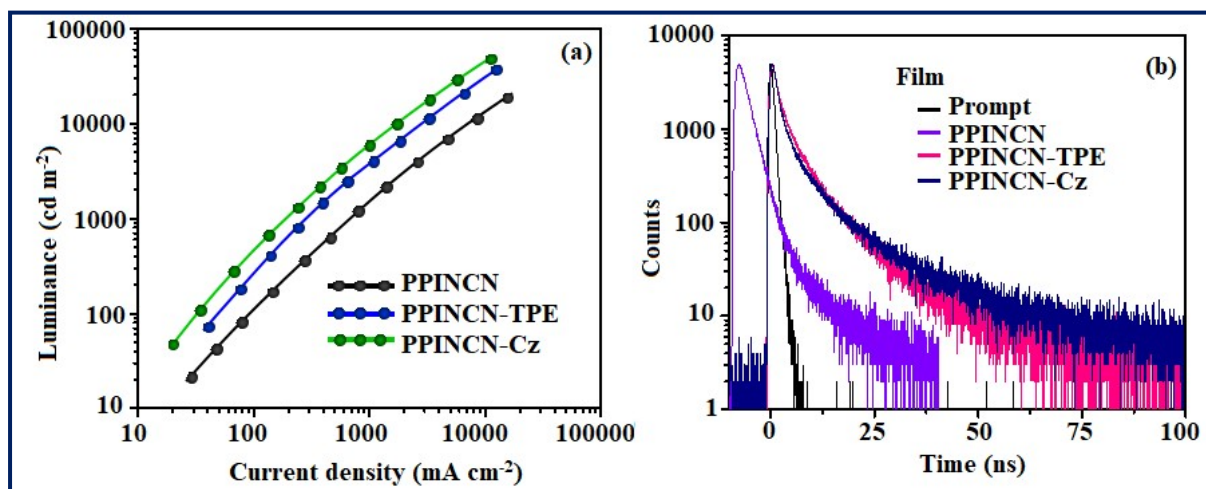

**Figure S13.** Graphical representation of  $D_{CT}$  and centroid of charges [ $C^+(r) / C^-(r)$ ; iso surface for PPINCN, PPINCN-TPE and PPINCN-Cz (0.1 a.u)].

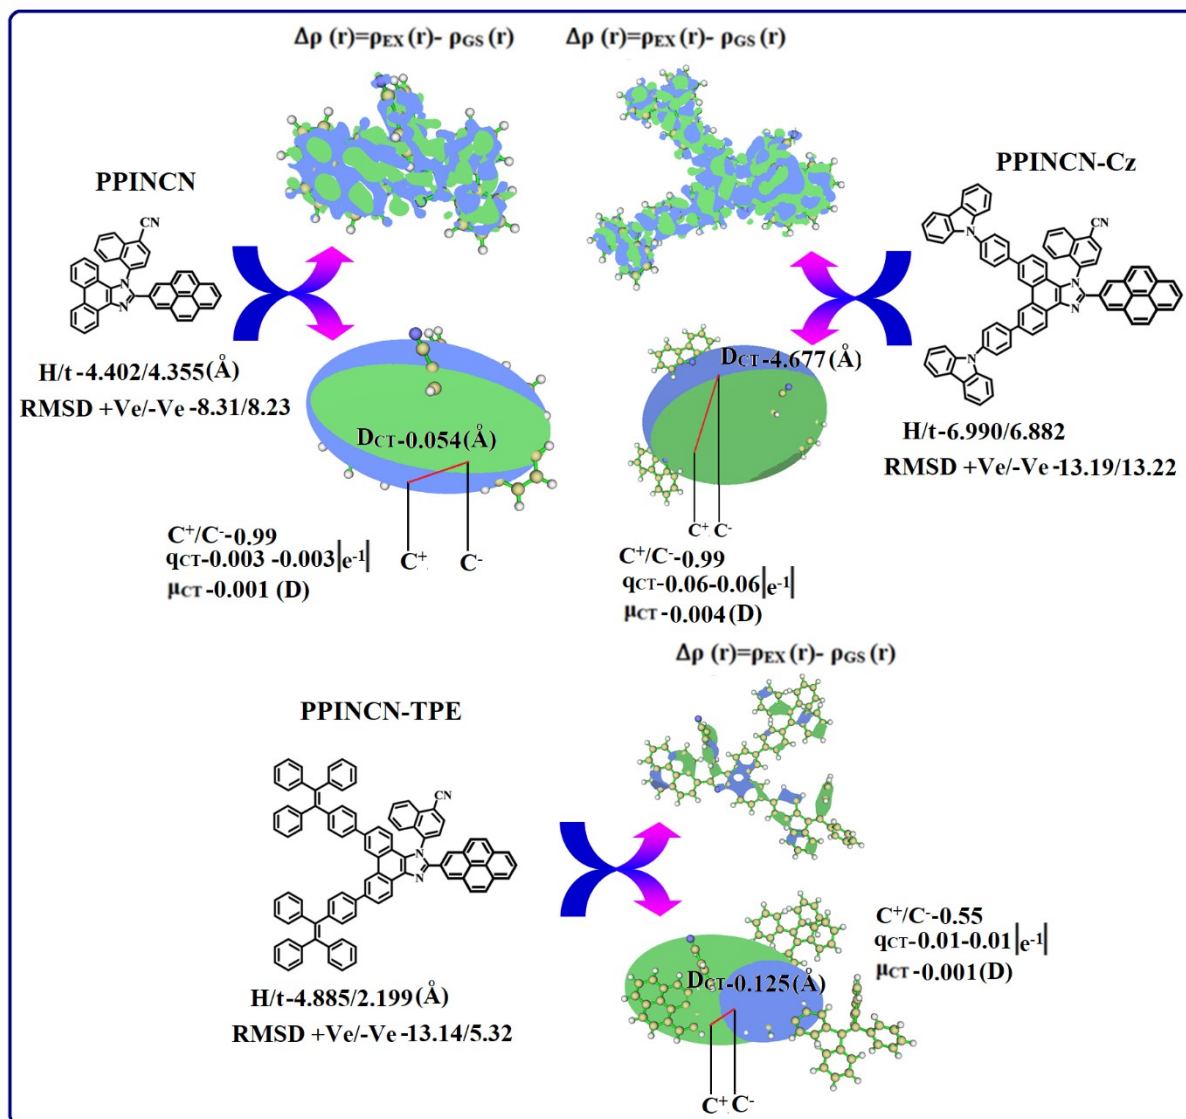

**SI-IV: Potential energy scan (PES)**

The potential energy surface (PES) scan have been plotted as a function of twist angle between C2 substituent and phenanthroimidazole core in gas phase and different polar solvents (Figures S14 – S17). In gas phase, it is impossible for S3 mixing with S1 state as a result of large energy gap between them. An increasing solvent polarity, the large dipole moment of S3 state leads to energetic stabilization. In low polarity solvent (hexane), S3 state can intercross with S1 state whereas in high polarity solvent (acetonitrile), S3 state energy decreases sharply and becomes lowest excited state. In moderate polar solvents (chloroform), the energetic closeness results in an enhanced mixing of S3 with S1. Therefore, S1 state is dominated by LE character in low polar medium; S1 state is dominated by mixing LE and CT character in moderate polar medium and S1 state is dominated by CT character in high polar medium.

Figure S14. Potential energy surface scan (PES) diagram.

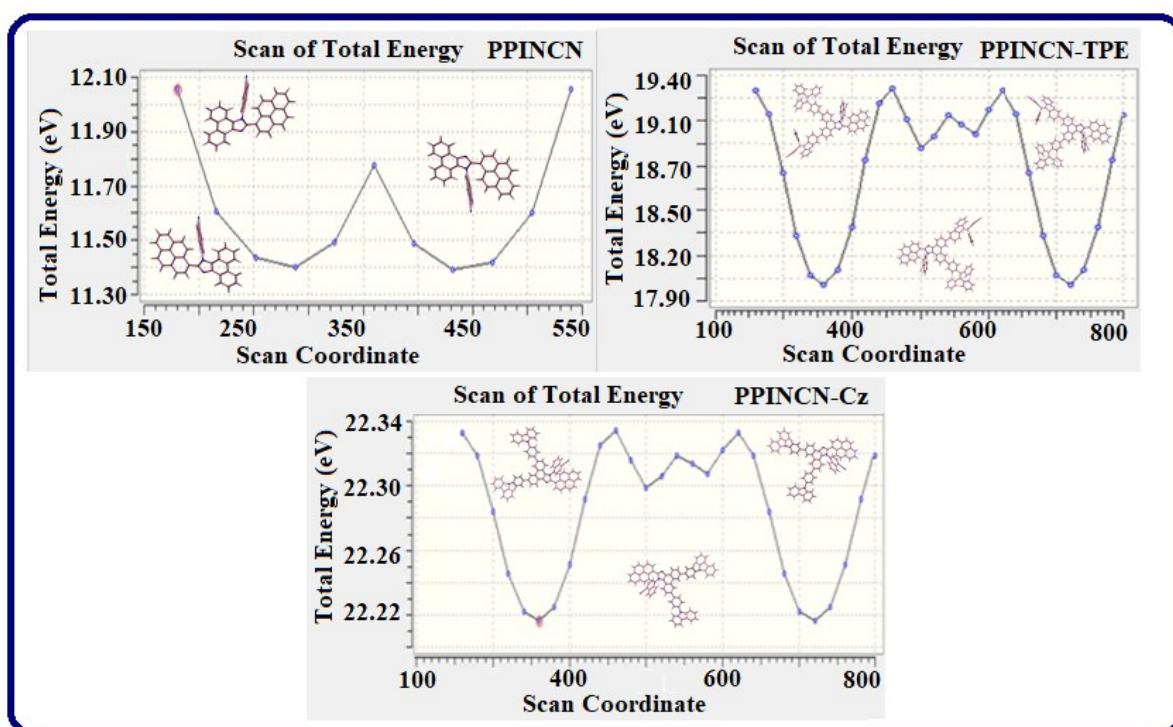

Figure S15. Potential energy scan (PES) of  $S_1$ - $S_3$  excited states of PPINCN with increasing solvent polarity.

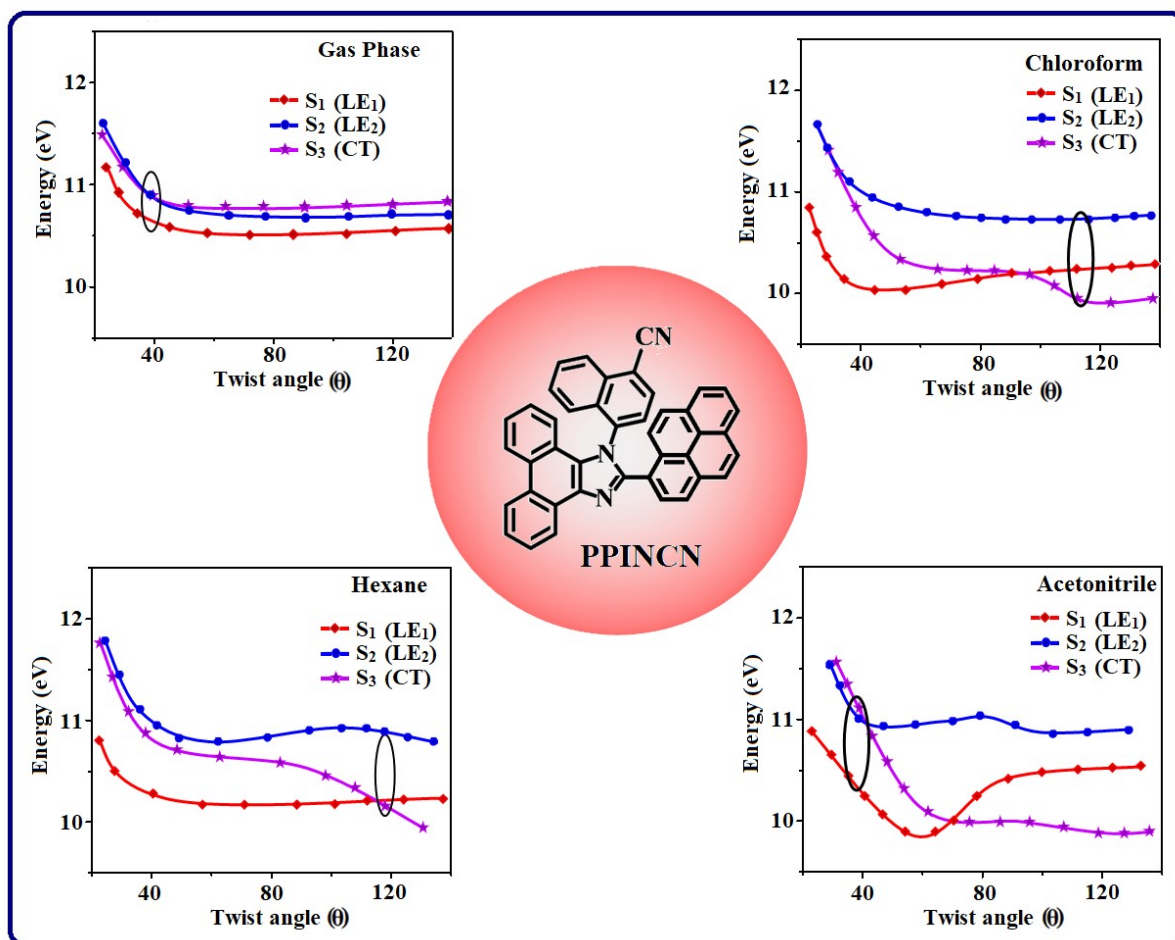

Figure S16. Potential energy scan (PES) of  $S_1$ - $S_3$  excited states of PPINCN-TPE with increasing solvent polarity.

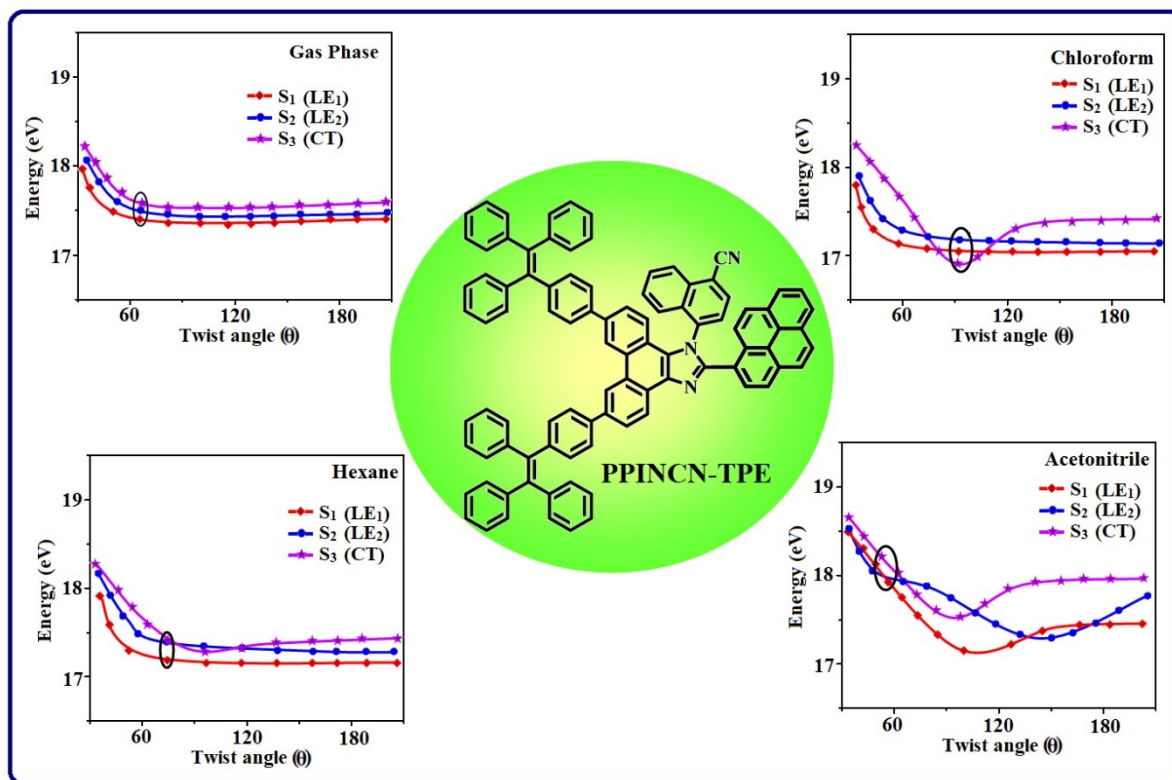

Figure S17. Potential energy scan (PES) of  $S_1$ - $S_3$  excited states of PPINCN-Cz with increasing solvent polarity.

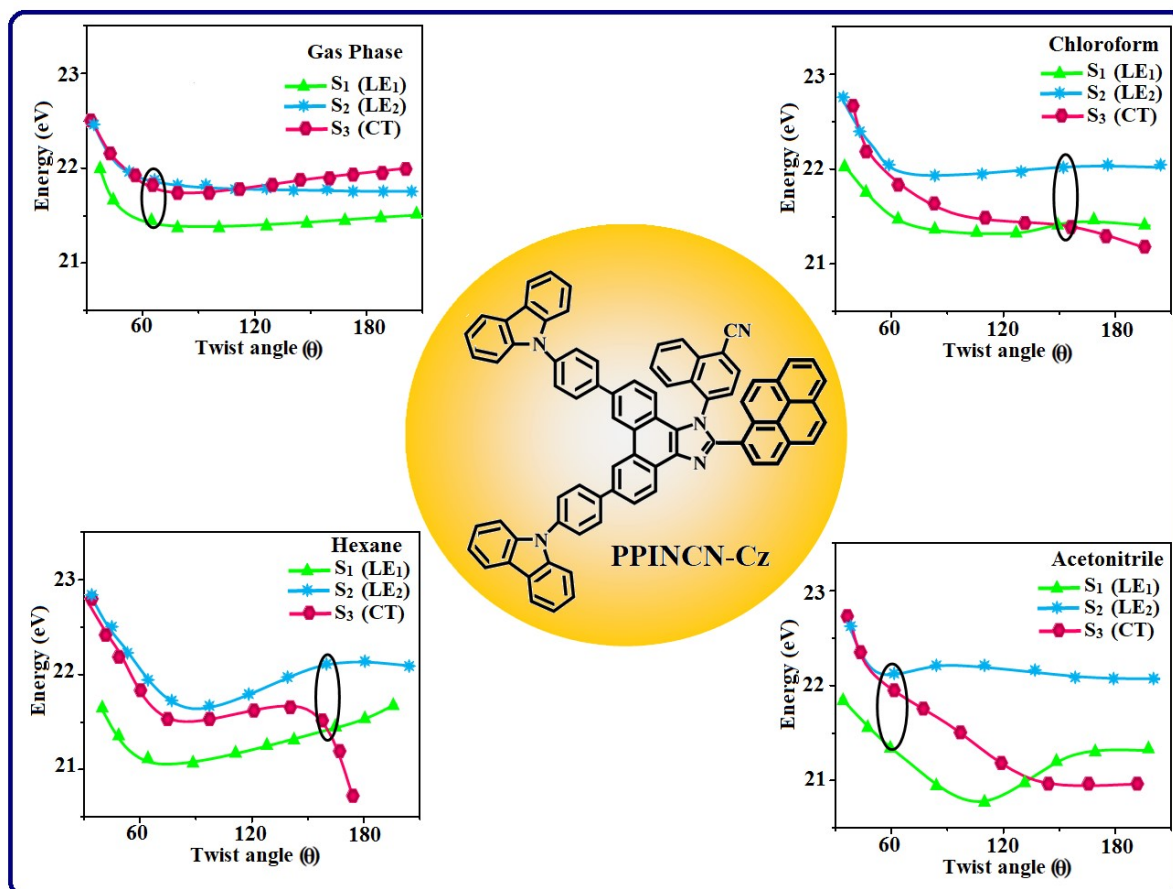



## SI-V: Tables

**Table S1.** Computed excitation energy (eV), excitation coefficient,  $\Delta r$  intex ( $\text{\AA}$ ) oscillator strength (f) and dipolemoment ( $\mu$ ) for singlet and triplet states of PPINCN.

| State | Excitation energy | Excitation coefficient | $\Delta r$ intex | Oscillator strength (f) | $\mu$ (D) | NTO Transitions              |
|-------|-------------------|------------------------|------------------|-------------------------|-----------|------------------------------|
| S1    | 1.72              | 0.4471                 | 1.5257           | 0.1235                  | 0.96      | 87%<br>103 $\rightarrow$ 104 |
| S2    | 2.17              | 0.4466                 | 0.8609           | 0.4823                  | 2.52      | 64%<br>103 $\rightarrow$ 105 |
| S3    | 2.56              | 0.4287                 | 2.0568           | 0.0607                  | 1.19      | 42%<br>103 $\rightarrow$ 107 |
| S4    | 2.87              | 0.4205                 | 1.3484           | 0.5833                  | 0.55      | 78%<br>102 $\rightarrow$ 104 |
| S5    | 3.05              | 0.4014                 | 2.0599           | 0.2426                  | 1.50      | 34%<br>103 $\rightarrow$ 106 |
| T1    | 0.28              | 0.4296                 | 1.1438           | 0.0000                  | 0.80      | 74%<br>103 $\rightarrow$ 105 |
| T2    | 0.98              | 0.3644                 | 1.6052           | 0.0000                  | 0.61      | 45%<br>102 $\rightarrow$ 104 |
| T3    | 1.57              | 0.3742                 | 1.8698           | 0.0000                  | 1.06      | 39%<br>103 $\rightarrow$ 107 |
| T4    | 1.66              | 0.3689                 | 2.8575           | 0.0000                  | 0.33      | 25%<br>101 $\rightarrow$ 106 |
| T5    | 1.85              | 0.3579                 | 1.7925           | 0.0000                  | 1.56      | 21%<br>103 $\rightarrow$ 104 |

**Table S2. Computed excitation energy (eV), excitation coefficient,  $\Delta r$  intex ( $\text{\AA}$ ), oscillator strength (f) and dipolemoment ( $\mu$ ) for singlet and triplet states of PPINCN-TPE.**

| State | Excitation energy | Excitation coefficient | $\Delta r$ intex | Oscillator strength (f) | $\mu$ (D) | NTO Transitions                         |
|-------|-------------------|------------------------|------------------|-------------------------|-----------|-----------------------------------------|
| S1    | 1.75              | 0.4571                 | 1.5257           | 0.9219                  | 1.16      | <sup>87%</sup><br>223 $\rightarrow$ 226 |
| S2    | 2.27              | 0.4566                 | 0.8609           | 0.1082                  | 2.10      | <sup>82%</sup><br>223 $\rightarrow$ 227 |
| S3    | 2.66              | 0.4487                 | 2.0568           | 0.0041                  | 3.70      | <sup>50%</sup><br>224 $\rightarrow$ 228 |
| S4    | 2.97              | 0.4305                 | 1.3484           | 0.0035                  | 2.15      | <sup>44%</sup><br>222 $\rightarrow$ 228 |
| S5    | 3.15              | 0.4114                 | 2.0599           | 0.3317                  | 1.56      | <sup>54%</sup><br>225 $\rightarrow$ 229 |
| T1    | 1.53              | 0.4322                 | 1.1349           | 0.0000                  | 1.16      | <sup>65%</sup><br>223 $\rightarrow$ 227 |
| T2    | 1.77              | 0.4277                 | 1.6053           | 0.0000                  | 2.10      | <sup>21%</sup><br>225 $\rightarrow$ 229 |
| T3    | 2.03              | 0.4045                 | 1.8698           | 0.0000                  | 3.70      | <sup>47%</sup><br>221 $\rightarrow$ 226 |
| T4    | 2.32              | 0.3787                 | 2.8576           | 0.0000                  | 2.15      | <sup>28%</sup><br>225 $\rightarrow$ 234 |
| T5    | 2.34              | 0.4201                 | 1.7925           | 0.0000                  | 1.56      | <sup>24%</sup><br>224 $\rightarrow$ 242 |

**Table S3. Computed excitation energy (eV), excitation coefficient,  $\Delta r$  intex ( $\text{\AA}$ ), oscillator strength (f) and dipolemoment ( $\mu$ ) for singlet and triplet states of PPINCN-Cz.**

| State | Excitation energy | Excitation coefficient | $\Delta r$ intex | Oscillator strength (f) | $\mu$ (D) | NTO Transitions                         |
|-------|-------------------|------------------------|------------------|-------------------------|-----------|-----------------------------------------|
| S1    | 1.63              | 0.4635                 | 2.0605           | 0.7103                  | 2.66      | <sup>86%</sup><br>191 $\rightarrow$ 192 |
| S2    | 1.69              | 0.4403                 | 3.4088           | 0.6892                  | 0.55      | <sup>74%</sup><br>189 $\rightarrow$ 195 |
| S3    | 1.98              | 0.4546                 | 3.5474           | 0.0737                  | 1.97      | <sup>49%</sup><br>188 $\rightarrow$ 194 |
| S4    | 2.49              | 0.4309                 | 2.7546           | 0.1371                  | 2.76      | <sup>69%</sup><br>191 $\rightarrow$ 197 |
| S5    | 2.64              | 0.4282                 | 3.3994           | 0.0537                  | 3.45      | <sup>49%</sup><br>191 $\rightarrow$ 201 |
| T1    | 0.33              | 0.4229                 | 3.2301           | 0.0000                  | 0.54      | <sup>76%</sup><br>191 $\rightarrow$ 192 |
| T2    | 0.96              | 0.3738                 | 3.3564           | 0.0000                  | 1.82      | <sup>30%</sup><br>187 $\rightarrow$ 195 |
| T3    | 1.30              | 0.3178                 | 2.3511           | 0.0000                  | 0.13      | <sup>22%</sup><br>190 $\rightarrow$ 192 |
| T4    | 1.39              | 0.2615                 | 2.4407           | 0.0000                  | 0.13      | <sup>28%</sup><br>191 $\rightarrow$ 192 |
| T5    | 1.63              | 0.2754                 | 1.5980           | 0.0000                  | 0.66      | <sup>19%</sup><br>188 $\rightarrow$ 198 |

**Table S4. Photophysical properties of PPINCN in different solvents.**

| Solvents        | $\epsilon$ | n     | f<br>( $\epsilon, n$ ) | $\lambda_{ab}$<br>(nm) | $\nu_{ab}$<br>( $\text{cm}^{-1}$ ) | $\lambda_{flu}$<br>(nm) | $\nu_{flu}$<br>( $\text{cm}^{-1}$ ) | $\nu_{ss}$<br>( $\text{cm}^{-1}$ ) | $\Phi_{PL}$ |
|-----------------|------------|-------|------------------------|------------------------|------------------------------------|-------------------------|-------------------------------------|------------------------------------|-------------|
| Hexane          | 1.88       | 1.37  | 0.0004                 | 332                    | 30120.5                            | 388                     | 25773.2                             | 4347.3                             | 28.3        |
| Triethylamine   | 2.42       | 1.401 | 0.048                  | 333                    | 30030.1                            | 392                     | 25510.2                             | 4519.8                             | 25.6        |
| Butylether      | 3.08       | 1.399 | 0.096                  | 336                    | 29761.9                            | 400                     | 25000                               | 4761.9                             | 24.2        |
| Isopropylether  | 3.88       | 1.368 | 0.145                  | 343                    | 29154.5                            | 415                     | 24096.4                             | 5058.1                             | 23.6        |
| Ethyl ether     | 4.34       | 1.352 | 0.167                  | 346                    | 28901.7                            | 419                     | 23866.3                             | 5035.4                             | 21.0        |
| THF             | 7.52       | 1.405 | 0.2096                 | 348                    | 28735.6                            | 426                     | 23474.2                             | 5261.4                             | 20          |
| Dichloromethane | 9.08       | 1.424 | 0.2183                 | 352                    | 28409.1                            | 432                     | 23148.1                             | 5260.9                             | 15.6        |
| DMSO            | 47         | 1.478 | 0.2183                 | 354                    | 28248.6                            | 440                     | 22727.3                             | 5521.3                             | 11.4        |
| Acetone         | 21.01      | 1.358 | 0.2847                 | 358                    | 27932.9                            | 448                     | 22321.4                             | 5611.5                             | 7.6         |
| Acetonitrile    | 37.5       | 1.344 | 0.3053                 | 358                    | 27932.9                            | 450                     | 22222.2                             | 5710.7                             | 5.3         |

**Table S5. Photophysical properties of PPINCN-TPE in different solvents.**

| <b>Solvents</b> | <b><math>\epsilon</math></b> | <b>n</b> | <b>f<br/>(<math>\epsilon, n</math>)</b> | <b><math>\lambda_{ab}</math><br/>(nm)</b> | <b><math>\nu_{ab}</math><br/>(<math>\text{cm}^{-1}</math>)</b> | <b><math>\lambda_{flu}</math><br/>(nm)</b> | <b><math>\nu_{flu}</math><br/>(<math>\text{cm}^{-1}</math>)</b> | <b><math>\nu_{ss}</math><br/>(<math>\text{cm}^{-1}</math>)</b> | <b><math>\Phi_{PL}</math></b> |
|-----------------|------------------------------|----------|-----------------------------------------|-------------------------------------------|----------------------------------------------------------------|--------------------------------------------|-----------------------------------------------------------------|----------------------------------------------------------------|-------------------------------|
| Hexane          | 1.88                         | 1.37     | 0.0004                                  | 318                                       | 31446.5                                                        | 415                                        | 24096.4                                                         | 7350.1                                                         | 69.8                          |
| Triethylamine   | 2.42                         | 1.401    | 0.048                                   | 319                                       | 31347.9                                                        | 418                                        | 23923.4                                                         | 7424.5                                                         | 60.6                          |
| Butylether      | 3.08                         | 1.399    | 0.096                                   | 322                                       | 31055.9                                                        | 426                                        | 23474.2                                                         | 7581.7                                                         | 52.3                          |
| Isopropylether  | 3.88                         | 1.368    | 0.145                                   | 324                                       | 30864.2                                                        | 433                                        | 23094.7                                                         | 7769.5                                                         | 48.4                          |
| Ethyl ether     | 4.34                         | 1.352    | 0.167                                   | 327                                       | 30581.1                                                        | 437                                        | 22883.3                                                         | 7697.7                                                         | 46.3                          |
| THF             | 7.52                         | 1.405    | 0.2096                                  | 326                                       | 30674.8                                                        | 442                                        | 22624.4                                                         | 8050.4                                                         | 3.8                           |
| Dichloromethane | 9.08                         | 1.424    | 0.2183                                  | 326                                       | 30674.8                                                        | 448                                        | 22321.4                                                         | 8353.4                                                         | 30.8                          |
| DMSO            | 47                           | 1.478    | 0.2183                                  | 327                                       | 30581.1                                                        | 456                                        | 21929.8                                                         | 8651.2                                                         | 25.6                          |
| Acetone         | 21.01                        | 1.358    | 0.2847                                  | 328                                       | 30487.8                                                        | 464                                        | 21551.7                                                         | 8936.1                                                         | 18.9                          |
| Acetonitrile    | 37.5                         | 1.344    | 0.3053                                  | 329                                       | 30395.1                                                        | 469                                        | 21321.9                                                         | 9073.2                                                         | 10.6                          |

**Table S6. Photophysical properties of PPINCN-Cz in different solvents.**

| Solvents        | $\epsilon$ | n     | f<br>( $\epsilon, n$ ) | $\lambda_{ab}$<br>(nm) | $\nu_{ab}$<br>( $\text{cm}^{-1}$ ) | $\lambda_{flu}$<br>(nm) | $\nu_{flu}$<br>( $\text{cm}^{-1}$ ) | $\nu_{ss}$<br>( $\text{cm}^{-1}$ ) | $\Phi_{PL}$ |
|-----------------|------------|-------|------------------------|------------------------|------------------------------------|-------------------------|-------------------------------------|------------------------------------|-------------|
| Hexane          | 1.88       | 1.37  | 0.0004                 | 328                    | 30487.8                            | 395                     | 25316.4                             | 5171.3                             | 62.0        |
| Triethylamine   | 2.42       | 1.401 | 0.048                  | 332                    | 30120.5                            | 403                     | 24813.9                             | 5306.6                             | 59.3        |
| Butyl ether     | 3.08       | 1.399 | 0.096                  | 333                    | 30030.1                            | 408                     | 24509.8                             | 5520.2                             | 52.8        |
| Isopropyl ether | 3.88       | 1.368 | 0.145                  | 334                    | 29940.1                            | 412                     | 24271.8                             | 5668.3                             | 43.1        |
| Ethyl ether     | 4.34       | 1.352 | 0.167                  | 336                    | 29761.9                            | 417                     | 23980.8                             | 5781.1                             | 38.4        |
| THF             | 7.52       | 1.405 | 0.2096                 | 333                    | 30030.1                            | 420                     | 23809.5                             | 6220.5                             | 32          |
| Dichloromethane | 9.08       | 1.424 | 0.2183                 | 334                    | 29940.1                            | 422                     | 23696.7                             | 6243.4                             | 28.3        |
| DMSO            | 47         | 1.478 | 0.2183                 | 332                    | 30120.5                            | 428                     | 23364.5                             | 6755.9                             | 22.6        |
| Acetone         | 21.01      | 1.358 | 0.2847                 | 336                    | 29761.9                            | 434                     | 22935.8                             | 6826.1                             | 17.8        |
| Acetonitrile    | 37.5       | 1.344 | 0.3053                 | 332                    | 30120.5                            | 436                     | 22988.5                             | 7131.9                             | 6.9         |

**Table S7. Computed integral of hole and electron overlap (S), distance between centroids of hole and electron (D, Å) and dipole moment ( $\mu$ ) for singlet and triplet states of PPINCN.**

| State | $\int h^+$ | $\int e^-$ | $\int T$ | (S)    | Centroid of hole (Å) |         |         | Centroid of electron (Å) |         |         | D (Å) | $\mu$ (a.u) |
|-------|------------|------------|----------|--------|----------------------|---------|---------|--------------------------|---------|---------|-------|-------------|
|       |            |            |          |        | x                    | y       | z       | x                        | y       | Z       |       |             |
| S1    | 0.8244     | 0.7287     | -0.0152  | 0.3846 | -0.5583              | 1.1374  | 0.4357  | -1.0278                  | 1.2180  | -0.0135 | 0.65  | 0.96        |
| S2    | 0.8269     | 0.7294     | -0.0117  | 0.2906 | -0.6646              | 1.0144  | 0.4290  | -1.7124                  | -0.2917 | 0.0565  | 1.71  | 2.52        |
| S3    | 0.7997     | 0.6430     | 0.0097   | 0.2490 | -0.8351              | 0.8621  | 0.3925  | -0.4091                  | 1.3998  | -0.1515 | 0.87  | 1.19        |
| S4    | 0.8579     | 0.7080     | -0.0037  | 0.4988 | -2.8068              | -0.8770 | -0.0420 | -2.444                   | -0.8956 | -0.1267 | 0.37  | 0.55        |
| S5    | 0.7636     | 0.5982     | -0.0037  | 0.3061 | -1.1819              | 0.5734  | 0.3162  | -0.4244                  | -0.1162 | -0.2442 | 1.16  | 1.50        |
| T1    | 0.7933     | 0.6633     | -0.0210  | 0.4030 | -0.5952              | 1.1036  | 0.4283  | -0.3733                  | 1.5856  | 0.1770  | 0.58  | 0.80        |
| T2    | 0.7522     | 0.6101     | -0.0054  | 0.4872 | -2.9033              | -0.9830 | -0.0252 | -3.2011                  | -1.3416 | -0.1161 | 0.47  | 0.61        |
| T3    | 0.6930     | 0.5502     | 0.0142   | 0.2428 | -0.6646              | 1.0144  | 0.4290  | -0.3484                  | 1.8526  | 0.5668  | 0.90  | 1.06        |
| T4    | 0.7959     | 0.5670     | -0.0100  | 0.5128 | 3.6491               | -0.7093 | -0.0438 | 3.4568                   | -0.5505 | -0.1042 | 0.25  | 0.33        |
| T5    | 0.7038     | 0.5690     | -0.0058  | 0.3125 | -0.8039              | 1.1853  | 0.1920  | -1.6229                  | 0.2814  | -0.2710 | 1.30  | 1.56        |

**Table S8. Computed integral of hole and electron overlap (S), distance between centroids of hole and electron (D, Å) and dipole moment ( $\mu$ ) for singlet and triplet states of PPINCN-TPE.**

| State | $\int h^+$ | $\int e^-$ | $\int T$ | (S)    | Centroid of hole (Å) |         |         | Centroid of electron (Å) |         |         | D (Å) | $\mu$ (a.u) |
|-------|------------|------------|----------|--------|----------------------|---------|---------|--------------------------|---------|---------|-------|-------------|
|       |            |            |          |        | x                    | y       | z       | x                        | y       | z       |       |             |
| S1    | 0.7897     | 0.6963     | 0.0223   | 0.3312 | -6.5490              | -1.3346 | 0.6804  | -6.9642                  | -1.8725 | 0.2058  | 0.82  | 1.16        |
| S2    | 0.7815     | 0.7004     | -0.0150  | 0.2844 | -6.5490              | -1.3346 | 0.6804  | -7.1396                  | -2.6407 | 0.2317  | 1.50  | 2.10        |
| S3    | 0.6945     | 0.6618     | -0.0078  | 0.1504 | 1.4818               | 9.2931  | 0.0320  | 0.8906                   | 6.4816  | -0.3226 | 2.89  | 3.70        |
| S4    | 0.6826     | 0.6138     | -0.0109  | 0.2061 | 1.5559               | 8.3578  | -0.2752 | 1.0877                   | 6.6595  | -0.2670 | 1.76  | 2.15        |
| S5    | 0.7825     | 0.6764     | 0.0031   | 0.2758 | 5.6625               | -4.222  | -0.085  | 6.7277                   | -3.9191 | 0.1671  | 1.13  | 1.56        |
| T1    | 0.7897     | 0.6963     | 0.0223   | 0.3312 | -6.5490              | -1.3346 | 0.6804  | -6.9642                  | -1.8725 | 0.2058  | 0.82  | 1.16        |
| T2    | 0.7815     | 0.7004     | -0.0150  | 0.2844 | -6.5490              | -1.3346 | 0.6804  | -7.1396                  | -2.6407 | 0.2317  | 1.50  | 2.10        |
| T3    | 0.6945     | 0.6618     | -0.0078  | 0.1504 | 1.4818               | 9.2931  | 0.0320  | 0.8906                   | 6.4816  | -0.3226 | 2.89  | 3.70        |
| T4    | 0.6826     | 0.6138     | -0.0109  | 0.2061 | 1.5559               | 8.3578  | -0.2752 | 1.0877                   | 6.6599  | -0.2670 | 1.76  | 2.15        |
| T5    | 0.7825     | 0.6764     | 0.0031   | 0.2758 | 5.6625               | -4.2222 | -0.0856 | 6.7277                   | -3.9191 | 0.1671  | 1.13  | 1.56        |



**Table S9. Computed integral of hole and electron overlap (S), distance between centroids of hole and electron (D, Å) and dipole moment ( $\mu$ ) for singlet and triplet states of PPINCN-Cz.**

| State | $\int h^+$ | $\int e^-$ | $\int T$ | (S)    | Centroid of hole (Å) |         |         | Centroid of electron (Å) |         |          | D (Å) | $\mu$ (a.u) |
|-------|------------|------------|----------|--------|----------------------|---------|---------|--------------------------|---------|----------|-------|-------------|
|       |            |            |          |        | x                    | y       | z       | x                        | Y       | z        |       |             |
| S1    | 0.8563     | 0.7538     | 0.0130   | 0.2469 | 6.8689               | -0.7690 | 0.1273  | 6.1260                   | -2.3548 | 0.0177   | 1.75  | 2.66        |
| S2    | 0.8134     | 0.6240     | -0.0323  | 0.2898 | 6.8689               | -0.7690 | 0.1273  | 6.6312                   | -1.0051 | -0.1117  | 0.41  | 0.55        |
| S3    | 0.8397     | 0.6591     | 0.0265   | 0.3020 | 6.8689               | -0.7690 | 0.1273  | 5.8589                   | 0.0515  | -0.39690 | 1.39  | 1.97        |
| S4    | 0.7960     | 0.6542     | 0.0060   | 0.1663 | 6.8689               | -0.7690 | 0.1273  | 6.6560                   | -2.777  | 0.1329   | 2.02  | 2.76        |
| S5    | 0.7910     | 0.5802     | -0.0270  | 0.1715 | 6.8689               | -0.7690 | 0.1273  | 4.7457                   | 0.5031  | -0.8584  | 2.66  | 3.45        |
| T1    | 0.7811     | 0.6582     | 0.0354   | 0.3930 | 6.8689               | -0.7690 | 0.1273  | 6.9866                   | -0.4236 | 0.2923   | 0.40  | 0.54        |
| T2    | 0.6905     | 0.4575     | -0.0208  | 0.2223 | 6.8689               | -0.7690 | 0.1273  | 5.3322                   | -0.1778 | -0.1946  | 1.67  | 1.82        |
| T3    | 0.5229     | 0.3821     | -0.0138  | 0.2910 | 5.4500               | -0.6691 | -0.1052 | 5.5153                   | -0.7088 | -0.2448  | 0.15  | 0.13        |
| T4    | 0.5229     | 0.3821     | -0.0138  | 0.2910 | 5.4500               | -0.6691 | -0.1052 | 5.5153                   | -0.7088 | -0.2448  | 0.15  | 0.13        |
| T5    | 0.5443     | 0.4329     | -0.0095  | 0.3065 | 1.4893               | -1.0096 | -0.1284 | 2.0142                   | -1.4774 | -0.2912  | 0.71  | 0.66        |

**Table S10. Computed RMSD of electron and hole, H index and t index for singlet and triplet states of PPINCN.**

| State | RMSD (Electron) |       |       |       | RMSD (Hole) |       |       |       | H index |       |       | t index |        |        |        |       |
|-------|-----------------|-------|-------|-------|-------------|-------|-------|-------|---------|-------|-------|---------|--------|--------|--------|-------|
|       | x               | y     | z     | total | x           | y     | z     | total | x       | y     | z     | Total   | x      | y      | z      | Total |
| S1    | 2.283           | 2.291 | 1.172 | 3.440 | 2.297       | 1.573 | 1.091 | 2.990 | 2.290   | 1.932 | 1.131 | 2.990   | -1.875 | -1.394 | -0.657 | 2.427 |
| S2    | 2.783           | 2.671 | 1.206 | 4.041 | 2.297       | 1.573 | 1.091 | 2.990 | 2.540   | 2.122 | 1.148 | 3.503   | -1.949 | -0.816 | -0.699 | 2.226 |
| S3    | 2.474           | 2.984 | 0.914 | 3.982 | 1.891       | 1.944 | 0.884 | 2.853 | 2.182   | 2.464 | 0.899 | 3.412   | -1.591 | 0.348  | -0.544 | 1.717 |
| S4    | 2.718           | 3.200 | 0.933 | 4.301 | 2.100       | 2.355 | 0.992 | 3.308 | 2.409   | 2.778 | 0.963 | 3.801   | -1.940 | -1.080 | -0.955 | 2.417 |
| S5    | 3.618           | 1.885 | 1.127 | 4.232 | 2.313       | 1.416 | 0.993 | 2.888 | 2.965   | 1.651 | 1.060 | 3.555   | -1.900 | -1.347 | -0.807 | 2.465 |
| T1    | 1.483           | 1.588 | 1.300 | 2.532 | 1.641       | 1.532 | 1.095 | 2.498 | 1.562   | 1.560 | 1.198 | 2.512   | -1.340 | 1.078  | -0.947 | 1.963 |
| T2    | 2.638           | 1.965 | 0.740 | 3.371 | 2.975       | 2.033 | 0.835 | 3.699 | 2.806   | 1.999 | 0.787 | 3.534   | -2.508 | -1.640 | -0.697 | 3.077 |
| T3    | 1.545           | 1.657 | 1.551 | 2.745 | 1.831       | 1.522 | 1.072 | 2.611 | 1.688   | 1.589 | 1.311 | 2.663   | -1.372 | -0.751 | -1.174 | 1.955 |
| T4    | 2.664           | 2.069 | 0.818 | 3.471 | 2.683       | 2.016 | 0.833 | 3.458 | 2.674   | 2.042 | 0.826 | 3.464   | -2.481 | -1.884 | -0.765 | 3.208 |
| T5    | 2.430           | 2.514 | 1.055 | 3.652 | 1.916       | 1.903 | 1.220 | 2.963 | 2.173   | 2.208 | 1.138 | 3.300   | -1.354 | -1.304 | -0.674 | 1.997 |

**Table S11. Computed RMSD of electron and hole, H index and t index for singlet and triplet states of PPINCN-TPE.**

| State | RMSD (Electron) |       |       |       | RMSD (Hole) |       |       |       | H index |       |       | t index |        |        |        |       |
|-------|-----------------|-------|-------|-------|-------------|-------|-------|-------|---------|-------|-------|---------|--------|--------|--------|-------|
|       | x               | y     | z     | total | x           | y     | z     | total | x       | y     | z     | Total   | x      | y      | z      | Total |
| S1    | 3.978           | 1.853 | 1.096 | 4.523 | 3.655       | 1.958 | 1.243 | 4.329 | 3.816   | 1.905 | 1.170 | 4.423   | -3.637 | -1.401 | -0.761 | 3.971 |
| S2    | 4.837           | 1.394 | 1.159 | 5.165 | 4.870       | 1.441 | 1.233 | 5.227 | 4.854   | 1.417 | 1.196 | 5.196   | -4.241 | -1.323 | -1.095 | 4.575 |
| S3    | 3.008           | 2.253 | 1.353 | 3.994 | 4.256       | 2.192 | 1.423 | 4.994 | 3.632   | 2.222 | 1.388 | 4.478   | -2.948 | -1.274 | -1.084 | 3.390 |
| S4    | 2.359           | 2.817 | 0.811 | 3.763 | 2.591       | 2.409 | 0.825 | 3.633 | 2.475   | 2.613 | 0.818 | 3.691   | -2.086 | -0.244 | -0.794 | 2.246 |
| S5    | 3.230           | 2.607 | 0.800 | 4.227 | 3.629       | 2.201 | 0.810 | 4.321 | 3.430   | 2.404 | 0.805 | 4.265   | -2.973 | -2.089 | -0.796 | 3.720 |
| T1    | 2.283           | 2.291 | 1.172 | 3.440 | 2.297       | 1.573 | 1.091 | 2.990 | 2.290   | 1.932 | 1.131 | 3.203   | -1.875 | -1.394 | -0.657 | 2.427 |
| T2    | 2.783           | 2.671 | 1.206 | 4.041 | 2.297       | 1.573 | 1.091 | 2.990 | 2.540   | 2.122 | 1.148 | 3.503   | -1.949 | -0.816 | -0.699 | 2.226 |
| T3    | 2.474           | 2.984 | 0.914 | 3.982 | 1.891       | 1.944 | 0.884 | 2.853 | 2.182   | 2.464 | 0.899 | 3.412   | -1.591 | 0.348  | -0.544 | 1.717 |
| T4    | 2.718           | 3.200 | 0.933 | 4.301 | 2.100       | 2.355 | 0.992 | 3.308 | 2.409   | 2.778 | 0.963 | 3.801   | -1.940 | -1.080 | -0.955 | 2.417 |
| T5    | 3.618           | 1.885 | 1.127 | 4.232 | 2.313       | 1.416 | 0.993 | 2.888 | 2.965   | 1.651 | 1.060 | 3.555   | -1.900 | -1.347 | -0.807 | 2.465 |

**Table S12. Computed RMSD of electron and hole, H index and t index for singlet and triplet states of PPINCN-Cz.**

| State | RMSD (Electron) |       |       |       | RMSD (Hole) |       |       |       | H index |       |       | t index |        |        |        |       |
|-------|-----------------|-------|-------|-------|-------------|-------|-------|-------|---------|-------|-------|---------|--------|--------|--------|-------|
|       | x               | y     | z     | total | x           | y     | z     | total | x       | y     | z     | Total   | x      | y      | z      | Total |
| S1    | 2.807           | 2,260 | 1.031 | 3.749 | 1.869       | 1.447 | 1.169 | 2.637 | 2.338   | 1.854 | 1.100 | 3.180   | -1.595 | -0.268 | -0.991 | 1.897 |
| S2    | 2.417           | 2.034 | 1.053 | 3.330 | 1.869       | 1.447 | 1.169 | 2.637 | 2.143   | 1.740 | 1.111 | 2.976   | -1.905 | -1.504 | -0.872 | 2.579 |
| S3    | 1.794           | 2.076 | 1.310 | 3.043 | 1.869       | 1.447 | 1.169 | 2.637 | 1.831   | 1.763 | 1.240 | 2.828   | -0.821 | -0.942 | -0.743 | 1.454 |
| S4    | 2.866           | 2.446 | 0.870 | 3.867 | 1.869       | 1.447 | 1.169 | 2.637 | 2.367   | 1.946 | 1.020 | 3.230   | -2.154 | 0.062  | -0.015 | 2.382 |
| S5    | 2.660           | 2.244 | 1.093 | 3.648 | 1.869       | 1.447 | 1.169 | 2.637 | 2.264   | 1.845 | 1.131 | 3.132   | -0.141 | -0.573 | -0.146 | 0.608 |
| T1    | 2.070           | 1.745 | 1.230 | 2.974 | 1.869       | 1.447 | 1.169 | 2.637 | 1.969   | 1.596 | 1.200 | 2.804   | -1.852 | -1.250 | -1.035 | 2.462 |
| T2    | 2.024           | 1.788 | 1.192 | 2.952 | 1.869       | 1.447 | 1.169 | 2.637 | 1.946   | 1.617 | 1.181 | 2.792   | -0.410 | -1.026 | -0.858 | 1.399 |
| T3    | 3.256           | 2.724 | 1.214 | 4.415 | 3.783       | 2.442 | 1.165 | 4.651 | 3.520   | 2.583 | 1.190 | 4.525   | -3.454 | -2.543 | -1.050 | 4.416 |
| T4    | 3.256           | 2.724 | 4.415 | 3.783 | 2.442       | 1.165 | 1.165 | 4.651 | 3.520   | 2.583 | 1.190 | 4.525   | -3.454 | -2.543 | -1.050 | 4.416 |
| T5    | 3.769           | 2.502 | 0.837 | 4.601 | 4.165       | 2.707 | 0.953 | 5.057 | 3.967   | 2.604 | 0.895 | 4.829   | -3.442 | -2.137 | -0.733 | 4.117 |

**Table S13.** Transferred charges ( $q_{CT}$ ), barycentres of electron density loss ( $R_+$ ) /gain ( $R_-$ ), distance between two barycenters ( $D_{CT}$ ), dipole moment of CT ( $\mu_{CT}$ ), RMSD of +ve/-ve parts, CT indices (H & t) and overlap integral of C+/C- of PPINCN, PPINCN-TPE and PPINCN-Cz.

| Blue emissive<br>& Host<br>materials | $R_+$ (Å) |        |        | $R_-$ (Å) |        |        | $D_{CT}$ (Å) | RMSD<br>of +ve<br>parts | RMSD<br>of -ve<br>parts | H / t indices<br>(Å) | overlap<br>integral<br>of C+ / C- |
|--------------------------------------|-----------|--------|--------|-----------|--------|--------|--------------|-------------------------|-------------------------|----------------------|-----------------------------------|
|                                      | x         | y      | z      | x         | y      | z      |              |                         |                         |                      |                                   |
| PPINCN                               | -0.573    | -0.267 | -0.068 | -0.616    | -0.258 | -0.036 | 0.054        | 8.318                   | 8.323                   | 4.402/4.355          | 0.9977                            |
| PPINCN-TPE                           | -5.523    | -0.043 | -1.100 | -0.942    | -0.933 | -0.799 | 4.677        | 13.148                  | 5.321                   | 4.885/2.199          | 0.5330                            |
| PPINCN-Cz                            | 1.346     | -0.091 | -0.085 | 1.295     | 0.022  | 0.094  | 0.125        | 13.195                  | 13.225                  | 6.990/6.882          | 0.9998                            |

## References

- [1] (a) M. J. Frisch, G. W. Trucks, H. B. Schlegel, G. E. Scuseria, M. A. Robb, J. R. Cheeseman, G. Scalmani, V. Barone, B. Mennucci, G. A. Petersson, H. Nakatsuji, M. Caricato, X. Li, H. P. Hratchian, A. F. Izmaylov, J. Bloino, G. Zheng, J. L. Sonnenberg, M. Hada, M. Ehara, K. Toyota, R. Fukuda, J. Hasegawa, M. Ishida, T. Nakajima, Y. Honda, O. Kitao, H. Nakai, T. Vreven, J. A. Montgomery, J. E. Peralta, F. Ogliaro, M. Bearpark, J. J. Heyd, E. Brothers, K. N. Kudin, V. N. Staroverov, R. Kobayashi, J. Normand, K. Raghavachari, A. Rendell, J. C. Burant, S. S. Iyengar, J. Tomasi, M. Cossi, N. Rega, J. M. Millam, M. Klene, J. E. Knox, J. B. Cross, V. Bakken, C. Adamo, J. Jaramillo, R. Gomperts, R. E. Stratmann, O. Yazyev, A. J. Austin, R. Cammi, C. Pomelli, J. W. Ochterski, R. L. Martin, K. Morokuma, V. G. Zakrzewski, G. A. Voth, P. Salvador, J. J. Dannenberg, S. Dapprich, A. D. Daniels, O. Farkas, J. B. Foresman, J. V. Ortiz, J. Cioslowski, D. J. Fox, *Gaussian, Inc., Wallingford CT (Revision A.02), Gaussian, Inc., Wallingford., CT.* 2009.
- [2] J. Jayabharathi, R. Ramyaa, V. Thanikachalam, P. Jeeva and E. Sarojpurani, *RSC Adv.*, 2019, **9**, 2948-2966.
- [3] H. Liu, Q. Bai, L. Ya, H. Zhan, H. Xu, S. Zhang, W. Li, Y. Gao, J. Li, P. Lu, H. Wang, B. Yang and Y. Ma, *Chem. Sci.*, 2015, **6**, 3797-3804.
- [4] Z. Wang, Y. Feng, H. Li, Z. Gao, X. Zhang, P. Lu, P. Chen, Y. Mab and S. Liu, *Phys. Chem. Chem. Phys.*, 2014, **16**, 10837-10843.
- [5] Y. F. Chang, H. F. Meng, G. L. Fan, K. T. Wong, H. W. Zan, H. W. Lin, H. L. Huang and S. F. Horn, *Org. Electron.*, 2016, **29**, 99-106.
- [6] Y. Zhang, T. Wai, N. F. Lua, Q. X. Tong, S. L. Lai, M. Y. Chan, H. L. Kwong and C. S. Lee, *Dyes Pigm.*, 2013, **98**, 190-194.

- [7] G. Li, J. Zhao, D. Zhang, J. Zhu, Z. Shi, S. Tao, Feng Lu and Q. Tong, *New J. Chem.*, 2017, **41**, 5191-5197.
- [8] S. Liu, F. He, H. Wang, H. Xu, C. Wang, F. Li and Y. Ma, *J. Mater. Chem.*, 2008, **18**, 4802-4807.
- [9] S. Kim, B. Sanyoto, W. T. Park, S. Kim, S. Mandal, J. C. Lim, Y. Y. Noh and J. H. Kim, *Adv. Mater.*, 2016, **28**, 10149-10154.
- [10] X. L. Li, X. Ouyang, D. Chen, X. Cai, M. Liu, Z. Ge, Y. Cao and S. J. Su, *Nanotechnol.*, 2016, **27**, 124001-124011.
